# 1 Pheromone-dependent olfaction bidirectionally regulates 2 muscle extracellular vesicles formation

3

4 Katarzyna Banasiak<sup>1</sup>, Agata Szczepańska<sup>2</sup>, Klaudia Kołodziejaska<sup>2</sup>, Abdulrahman Tudu  
5 Ibrahim<sup>2,3</sup>, Wojciech Pokrzywa<sup>1\*</sup>, Michał Turek<sup>2\*</sup>

6

## 7 Affiliations:

8 <sup>1</sup>*Laboratory of Protein Metabolism, International Institute of Molecular and Cell Biology in  
9 Warsaw, Poland.*

10 <sup>2</sup>*Laboratory of Animal Molecular Physiology, Institute of Biochemistry and Biophysics, Polish  
11 Academy of Sciences, Warsaw, Poland*

12 <sup>3</sup>*Faculty of Chemistry, Warsaw University of Technology, Warsaw, Poland*

13

14 \* Co-corresponding authors

15 Correspondence should be directed to:

16 MT: [m.turek@ibb.waw.pl](mailto:m.turek@ibb.waw.pl)

17 WP: [wpokrzywa@iimcb.gov.pl](mailto:wpokrzywa@iimcb.gov.pl)

18

## 19 Abstract

20 Extracellular vesicles (EVs), entities transporting a variety of cargo, are directly involved in  
21 many biological processes and intercellular communication, the characterization of which

22 requires studying multi-tissue organisms. We previously demonstrated that the largest  
23 evolutionarily conserved EVs, exophers, are a component of the *C. elegans* maternal somatic  
24 tissue resource management system, and their formation is induced by the embryos developing  
25 *in utero*. In this study, we explored inter-tissue regulatory networks of exophergenesis. We  
26 found that exophergenesis activity is differentially modulated by sex-specific ascaroside  
27 (pheromones) signaling molecules, known to have multiple functions in development and  
28 behavior. While hermaphrodite-released pheromones down-regulate exophergenesis, male-  
29 released pheromones favor strong exopher production. This ascaroside-dependent regulation is  
30 fine-tuned by exopher-promoting olfactory neurons exposed to the environment and exopher-  
31 inhibiting sensory neurons exposed to the body cavity. Therefore, we uncovered critical control  
32 nodes for muscle exophergenesis in response to environmental and internal conditions. Our  
33 findings may imply the existence of an analogous mechanism regulating cardiomyocyte  
34 exophers, which contributes to the olfactory dysfunction-dependent risk of cardiovascular  
35 disease in humans.

36

### 37 **Keywords**

38 *C. elegans*, muscles, extracellular vesicles, exophers, pheromones, olfactory neurons

39

### 40 **Main**

41 Extracellular vesicles (EVs) are lipid-bilayer-enclosed particles that most cell types release.  
42 Two major EV types can be distinguished based on their biogenesis: endosome-derived  
43 exosomes and membrane-derived ectosomes<sup>1</sup>. EVs can be employed by cells to remove  
44 unwanted biological material, such as misfolded proteins and damaged organelles, or to  
45 transport small molecules, including proteins and nucleic acids, enabling exchange and  
46 communication between cells. Therefore, they are critical in physiological processes and

47 pathological states involving disrupted cellular homeostasis<sup>2-5</sup>. To study EVs' genesis, content,  
48 and function, multicellular animal models are frequently employed. The nematode *C. elegans*  
49 has been successfully used to investigate the biology of EVs generated by various tissues,  
50 including neurons<sup>6,7</sup>, muscles<sup>8</sup>, hypodermis<sup>9</sup>, and reproductive system<sup>10,11</sup>. Here, as a model,  
51 we use a class of recently discovered EVs, termed exophers, to understand how ectosome  
52 biogenesis in somatic tissue is regulated at the whole organism level employing worms.  
53 Exophergensis (i.e., exopher generation) is an evolutionarily conserved phenomenon found  
54 from invertebrates to mammals, including humans. Exophers were shown to play a significant  
55 role in cellular stress response, tissue homeostasis, and organismal reproduction<sup>7,8,12,13</sup>. It was  
56 demonstrated that *C. elegans* neurons retain their regular activity in the face of proteotoxic  
57 stress by expelling protein aggregates, damaged mitochondria, and lysosomes into surrounding  
58 tissues via exophers<sup>7</sup>. Nicolás-Ávila et al. also demonstrated that mouse cardiomyocytes  
59 excrete defective mitochondria via exophers, which, in turn, restricts waste accumulation in the  
60 extracellular space and inflammasome activation, promoting metabolic homeostasis in the  
61 heart<sup>13</sup>. However, the biological roles of exophers extend beyond the elimination of superfluous  
62 cellular components. In our previous work, we showed that the body wall muscles (BWM) of  
63 *C. elegans* release exophers that can transport muscle-synthesized yolk proteins to support  
64 offspring development, increasing their odds of adapting to environmental conditions<sup>8</sup>. We do  
65 not, however, comprehend the mechanism of cell non-autonomous regulation of muscle  
66 exophergensis nor how this maternal somatic tissue resource management system responds to  
67 environmental conditions.

68 Animal-to-animal signals transmitted by pheromones in *C. elegans* have been shown to  
69 regulate maternal provisioning, development, and generation time<sup>14-16</sup>. Since muscle exophers  
70 mediate the transfer of maternal resources to offspring supporting their development, we  
71 hypothesized that exophergensis (Fig. 1a) is regulated by metabolites-mediated social cues

72 generated within the worm population. To investigate this, we cultured hermaphrodites on  
73 plates under two conditions and quantified exopher production by BWM. As the first condition,  
74 we used hermaphrodites cultured individually on a plate, thereby eliminating social cues from  
75 other worms. As a second condition, we used worms raised in a ten-hermaphrodites population  
76 from the beginning of their development (Fig. 1b). We noted that animals grown together in a  
77 ten-hermaphrodite population released, on average, 44% fewer exophers than single-grown  
78 worms (Fig. 1c). Hermaphrodites from both experimental groups contain the same number of  
79 embryos in utero (Fig. 1d), demonstrating that signaling from other hermaphrodites can  
80 modulate exopher production independently from previously postulated embryo-maternal  
81 signaling<sup>8</sup>. Moreover, growing hermaphrodites on plates with different population densities  
82 indicate a dose-dependent effect (Extended Data Fig. 1a). To rule out the possibility that  
83 exophogenesis is substantially regulated by the molecules derived from the bacterial food  
84 source, which could indirectly influence animal to animal communication, we decided to test  
85 various bacterial strains effect on worm's muscle exopher production. We directly compared  
86 *Escherichia coli* B strain OP50 and K-12 strain HT115, which are widely used in *C. elegans*  
87 culture<sup>17</sup> and RNAi silencing experiments<sup>18</sup>, respectively. As a result, we observed a slight  
88 increase in exopher number upon the *E. coli* HT115 diet compared to the OP50 diet (Extended  
89 Data Fig. 1b). However, the number of eggs present *in utero* at adulthood day 2 was elevated  
90 upon the HT115 diet (Extended Data Fig. 1c). Whether or not the bacteria were metabolically  
91 active (PFA-killed prior to plate culture) was irrelevant (Extended Data Fig. 1b), confirming  
92 that exophogenesis is robustly activated in worm's muscles regardless of the bacteria type used  
93 as a food source.

94 Next, we investigated if the presence of males influences exophers production by  
95 hermaphrodites similarly to the presence of other hermaphrodites. To verify this, we monitored  
96 the number of exophers in *him-5* mutants characterized by a significant increase of males in

97 the population (about 33% compared to 0.3% for wild type)<sup>19</sup>. Interestingly, *him-5* animals  
98 grown with males until the L4 stage and then transferred to a male-free plate (Fig. 1e) produce  
99 approximately 2.5 times more exophers than wild-type hermaphrodites grown from L1 on a  
100 male-free plate (Fig. 1f). This increase appears to be mediated by the embryo-maternal  
101 signaling as *him-5* mutant hermaphrodites contain 26% more embryos *in utero* than wild-type  
102 hermaphrodites (Fig. 1g). To rule out the possibility that an increase in the number of exophers  
103 released, may be a result of the *him-5* mutation rather than the presence of males in the  
104 population, we grew wild-type hermaphrodites on a plate conditioned with males for 48 hours,  
105 which we then removed (Fig. 1h). Growing hermaphrodites on male-conditioned plates  
106 increased exopher production to the same degree as when hermaphrodites were grown with  
107 males until the L4 larvae stage (Fig. 1i), regardless of the bacteria strain used as a food source  
108 (Extended Data Fig. 1d). However, this increase in exophers production was associated with a  
109 rise in the number of *in utero* embryos (Fig. 1j), indicating that *C. elegans* male pheromones  
110 can also drive embryo retention in hermaphrodite's uterus. Furthermore, adult hermaphrodites  
111 exposed to males' secretions as larvae showed no further increase in exopher production  
112 (Extended Data Fig. 1e). Our data indicate that exophers generation by hermaphrodite BWM  
113 is modulated by signals released in response to pheromonal stimulation. Male pheromones act  
114 through embryo-maternal signaling, while pheromones released by hermaphrodites  
115 downregulate exophogenesis independently from this pathway.

116 To further investigate muscle exopher regulation by pheromones, we took advantage of several  
117 worm mutants with altered ascaroside pheromones side-chain biosynthesis<sup>20</sup> (Fig. 2a). Mutants  
118 of the *maoc-1* gene display a reduction in exopher production, whereas the *daf-22* and *acox-1*  
119 mutants show an increase in exopher production (Fig. 2b). However, changes in  
120 exophogenesis levels in mutants correlate with the number of embryos present in their uterus  
121 (Fig. 2c), therefore, could be dependent on the embryo-maternal signaling. To distinguish the

122 change in exopher production from embryo-maternal signaling in the mutants mentioned  
123 above, we examined exophogenesis in wild-type animals maintained on plates with ascaroside  
124 biosynthesis mutants (one wild-type worm with nine mutant worms per plate) (Fig. 2d). The  
125 number of embryos in the uterus of wild-type animals reared in this way did not change (Fig.  
126 2f), yet we observed a decrease in exophogenesis in wild-type worms grown together with  
127 *maoc-1* mutants and an increase in the presence of *acox-1* worms (Fig. 2e). Finally, we isolated  
128 *C. elegans* secretory products from starving N2 wild-type and *maoc-1* mutant populations as  
129 previously described<sup>21</sup>. Next, we exposed growing worms to this isolate (Fig. 2g), which led to  
130 the increase in exophogenesis in a *maoc-1*-dependent manner (Fig. 2h). These results further  
131 confirm pheromone-based regulation of exopher formation with a critical role for ascarosides  
132 whose synthesis is mediated by MAOC-1.

133 Since many olfactory neurons detect ascarosides<sup>22</sup> (Fig. 3a), we examined whether genetic  
134 ablation of all ciliated sensory neurons would abolish pheromone-regulated exopher induction.  
135 Indeed, as shown in Fig. 3b, *che-13* mutants, which do not form proper cilia and are incapable  
136 of pheromone detection<sup>23</sup>, produce a minimal number of exophers. Furthermore, exposure of  
137 the *che-13* mutant to metabolites secreted by starving wild-type worms did not affect exopher  
138 production (Fig. 3c). To determine which sensory neurons mediate pheromone-dependent  
139 modulation of exophogenesis, we examined its level in animals with genetically ablated  
140 sensory neurons previously shown to be capable of pheromone detection<sup>22</sup>. The removal of  
141 ASK, ADL, or AWC neurons inhibited exopher production comparable to that observed in *che-*  
142 *13* mutants, whereas the ablation of ASH led to a slight decrease in exophogenesis. Notably,  
143 hermaphrodites with the addition of male-specific, pheromone-sensing CEM neurons (via *ceh-*  
144 *30* gain-of-function mutation<sup>24</sup>) did not show alterations in exopher production (Fig. 3d).

145 To identify neurons critical for the exophogenesis downregulation in response to the presence  
146 of other hermaphrodites, we grew hermaphrodites with genetic ablations of different classes of

147 olfactory neurons either as a single animal or in a ten-worms population (Fig. 1b scheme). Our  
148 analyses using mutant strains with impaired olfaction showed that ASH and ASI neurons play  
149 a crucial role in exophergenesis, with a small modulation coming from ASK neurons (Fig. 3e).  
150 Finally, masculinization of a hermaphrodite olfactory circuit by the addition of CEM male-  
151 specific neurons leads to a decrease in exopher production in solitary animals (Fig. 3e).  
152 Next, we investigated which olfactory neurons are necessary to detect male pheromones  
153 responsible for exophergenesis upregulation. To this end, we grew hermaphrodites with genetic  
154 ablations of different classes of olfactory neurons on male-conditioned plates (as shown in Fig.  
155 1h scheme). Our results demonstrate that the removal of ASK, AWB, or ADL neurons  
156 abolishes an increase in exopher production induced by male-released pheromones (Fig. 3f).  
157 These results align with previously described roles for ASK, AWB, and ADL neurons in male  
158 pheromones sensing<sup>25-28</sup>.  
159 Since genetic ablation of AWC thermo-responsive neurons<sup>29,30</sup> has a prominent effect on  
160 exophergenesis (Fig. 3d), we also investigated whether this process could be temperature-  
161 dependent. To assess this, we grew worms at 15, 20, or 25°C and measured the number of  
162 exophers produced by hermaphrodites that were at the peak of progeny production for each  
163 temperature<sup>31</sup>. We observed that the generation of muscle exophers increased as worm  
164 incubation temperature rises (Fig. 3g). Moreover, the removal of AWC aggravates this  
165 response, demonstrating temperature-dependent regulation of exophergenesis by these neurons  
166 (Fig. 3g).  
167 The binding of signaling molecules to the relevant receptor is the first step in transducing  
168 neuron chemosensory signals. More than 1,300 G protein-coupled receptors (GPCRs) mediate  
169 this communication in *C. elegans*<sup>32</sup>. Internal states and environmental conditions can modulate  
170 GPCRs expression to affect worm behavior<sup>33-36</sup>. To identify the receptor(s) responsible for  
171 ascaroside-mediated alterations in exopher formation, we performed RNA-sequencing of

172 animals grown either as a single animal or in a ten-hermaphrodites population (Extended Data  
173 Fig. 2a). On the transcriptional level, neither group differed markedly (Extended Data Fig. 2b),  
174 and none of the 7TM receptors was significantly up- or down-regulated (Supplementary Table  
175 1). However, *str-173* receptor transcript, which shows among all of the 7TM receptors one of  
176 the most evident trends between growth conditions (2.3 fold change) is, according to single-  
177 cell RNA-seq data<sup>37</sup>, expressed almost exclusively in ASK neurons (Extended Data Fig. 2c).  
178 Since ASK is crucial for pheromone-mediated modulation of exopher formation, we  
179 investigated the *str-173* role in this pathway.

180 The wrmScarlet CRISPR/Cas9-mediated knock-in for the *str-173* gene confirmed its strong  
181 expression in ASK neurons and revealed additional expression in OLG neurons, the pharynx,  
182 vulva muscles, and the tail (Extended Data Fig. 3a-b). Next, we created *str-173* null mutants  
183 again using CRISPR/Cas9 editing (Extended Data Fig. 3c) and observed that the basal level of  
184 exophergenesis was comparable to the wild-type control (Extended Data Fig. 3d). However,  
185 exophergenesis was lower for *str-173* null mutants grown as a single animal on their own plate  
186 compared to the wild-type control (Extended Data Fig. 3e). Moreover, *str-173* mutants exhibit  
187 a smaller increase in exopher production in response to male pheromones (Extended Data Fig.  
188 3f). This finding suggests that STR-173 plays a role in the signal processing that occurs in  
189 response to the metabolites secreted by other worms.

190 Among the 118 classes of neurons in *C. elegans*, only four are directly exposed to the  
191 pseudocoelomic cavity<sup>38</sup>. Three classes of these neurons, AQR, PQR, and URX regulate social  
192 feeding in worms<sup>39</sup>. Given that exophers are released to the worm's pseudocoelomic cavity and  
193 are regulated by social cues, we hypothesized that AQR, PQR, and URX might play a role in  
194 exophergenesis regulation. To test for that, we first investigated the effect of genetic ablation  
195 of AQR, PQR, and URX neurons on exopher production. Indeed, the removal of these neurons  
196 leads to a substantial increase in exophergenesis (Fig. 4a). Notably, the increased number of



197 exophers generated by worms with genetically ablated AQR, PQR, and URX neurons is not  
198 the result of embryo-maternal signaling as these animals contain an even lower number of eggs  
199 *in utero* (Fig. 4b) and have a smaller brood size (Extended Data Fig. 4a-b) than wild-type  
200 control.

201 To further validate the role of AQR, PQR, and URX neurons in the regulation of  
202 exophergenesis, we optogenetically inactivated or activated them using ArchT<sup>40</sup> or ReaChR<sup>41</sup>,  
203 respectively, and compared the number of exophers before and after the stimulus. We observed  
204 that 60 min of AQR, PQR, and URX neuron inactivation leads to a significant increase in  
205 exopher release (Fig. 4c and Extended Data Fig. 4c). On the other hand, 60 min of AQR, PQR,  
206 and URX neuron activation resulted in a significant decrease in exopher release after the  
207 stimulus was completed (Fig. 4d and Extended Data Fig. 4d).

208 Our data also demonstrates that opposing exophergenesis phenotypes in ASK-ablated animals  
209 and in worms with the genetic elimination of AQR, PQR, and URX are counterbalanced in  
210 worms with all four neuron classes removed (Fig. 4e). Finally, we show that AQR, PQR and  
211 URX participate in mediating response to hermaphrodite pheromones (Fig. 4f) but not to male  
212 pheromones (Fig. 4g) and their high activity is not sufficient to overcome the critical role of  
213 embryo-maternal signaling in exopher production (Fig. 4h-i). Altogether our data indicate that  
214 the volatile signals lowering exopher levels secreted by hermaphrodites act through the  
215 olfactory system and partly via AQR, PQR, and URX neurons. The male secretions detected  
216 by olfactory neurons, in turn, potentiate exophergenesis by promoting embryo accumulation *in*  
217 *utero*, and this triggers pro-exopher signals independent of the activity of AQR, PQR, and URX  
218 neurons (Fig. 4j).

219

## 220 **Discussion**

221 Sensory neurons, through various types of metabolites, tune the functionality of somatic tissues  
222 to environmental conditions. We demonstrated that this also applies to the production of  
223 exopher vesicles by muscles. Our data show that, depending on the type of ascaroside  
224 pheromone, exophergenesis can be up- or down-regulated within the *C. elegans* hermaphrodite  
225 population. This communication system enables individuals to optimally utilize their muscle  
226 resources for reproductive purposes depending on the biological and environmental context.  
227 Accordingly, the higher level of exophers in hermaphrodites exposed to male metabolites or  
228 mated with males is consistent with the idea that male pheromones promote resource allocation  
229 to the germline<sup>42</sup>, and exophers may contribute to oocyte/embryo quality. However, increasing  
230 exophergenesis accelerates the age-related deterioration in worm muscle function<sup>8</sup>. This is also  
231 in accordance with Aprison and Ruvinsky's observations that hermaphrodites hasten  
232 development and somatic aging in the presence of males<sup>43</sup>. As such, exophers probably act as  
233 biological executors and carriers of information in inter-animal communication. This is also  
234 consistent with observations that *Drosophila* males secrete extracellular vesicles that are  
235 important for mating behavior<sup>44</sup>, and the exchange of information between male and female  
236 flies leads to increased EV release from sperm secretory cells, which promotes fertility<sup>45</sup>.  
237 Therefore, this bidirectional regulation of physiological processes related to EV-mediated  
238 communication between animals appears to be evolutionarily conserved. In this regard, sensory  
239 neurons exposed to the body cavity are also anticipated to play a role. We showed that *C.*  
240 *elegans* AQR, PQR, and URX neurons, which monitor the metabolic state of the animal,  
241 transmit neuroendocrine signals to downregulate exophergenesis. Interestingly, these neurons  
242 belong to the class of ciliated neurons and their counterparts exposed to the environment are  
243 capable of extracellular vesicle production<sup>6</sup>. Therefore, it is tempting to speculate that AQR,

244 PQR, and URX could transmit biological information within the worm body using extracellular  
245 vesicles released to the pseudocoelomic cavity, which could assist classical neurotransmitters  
246 or neuropeptides. However, additional research is required to establish how this class of ciliated  
247 neurons suppresses exophers formation/release by BWM.

248 Using *C. elegans* as a model, we showed that exopher production in one tissue is controlled by  
249 signals from another. Similar programs that enable fine-tuning of cell-to-cell communication  
250 based on exophers facilitating efficient use of resources in multiple tissues may work in  
251 humans, as confirmed by studies on other classes of EVs<sup>46</sup>. Moreover, our results demonstrate  
252 the worm's olfactory system's importance in regulating exopher formation in muscles. Notably,  
253 olfactory dysfunction in humans has been shown to lead to an increased likelihood of  
254 cardiovascular disease (CVD)<sup>47,48</sup>. This could result from faulty regulation of exophergenesis  
255 in the heart, which helps maintain homeostasis during cardiac stress. However, additional  
256 research is required to determine whether mammals possess a comparable exopher control  
257 system depending on the olfactory network.

258

259 **Figures and figure legends**

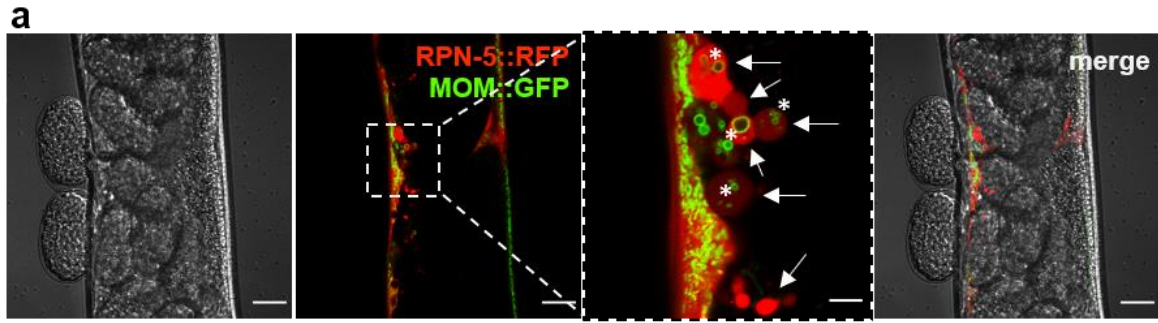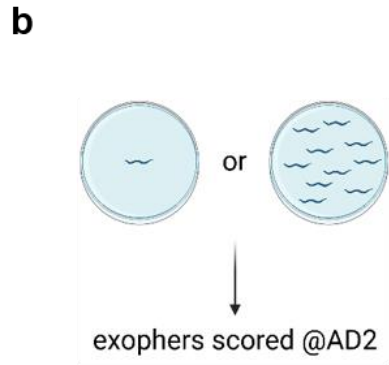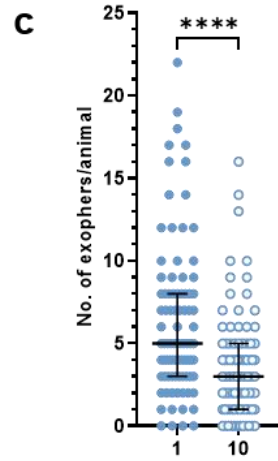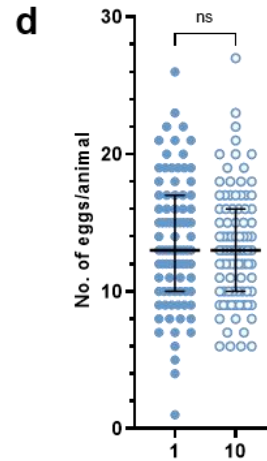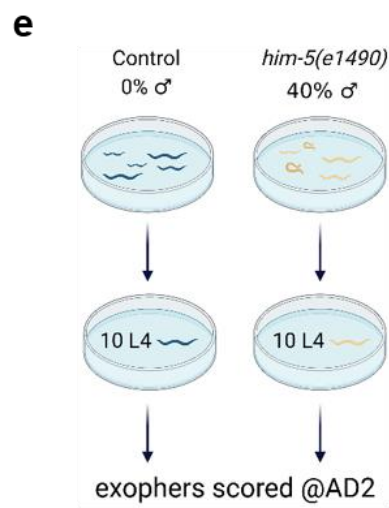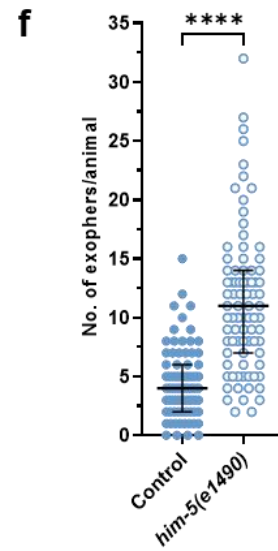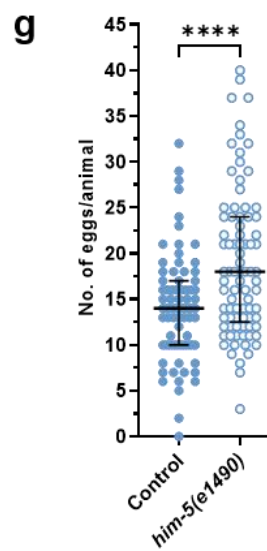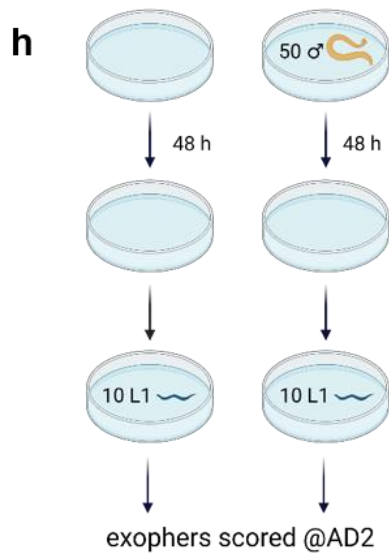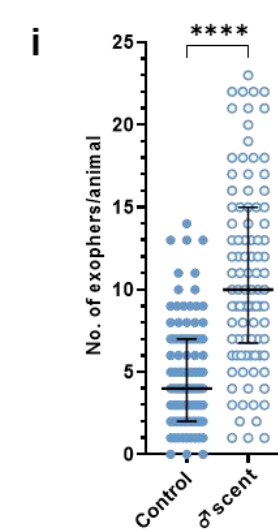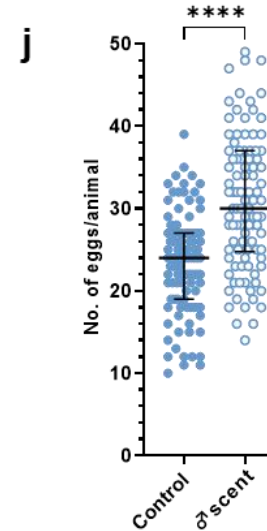

261 **Figure 1. Production of *Caenorhabditis elegans* muscle exophers is regulated by**  
262 **hermaphrodites' and males' presence.**

263 **a** An example of *C. elegans* muscle exopher containing mitochondria. Red fluorescence  
264 comes from RPN-5 proteasome subunit tagged with wrmScarlet fluorescent protein. Green  
265 fluorescence show mitochondrial outer membrane (MOM) tagged with GFP. Arrows point to  
266 examples of exophers, asterisks indicate mitochondria-containing exophers.

267 **b** Experimental design for determining the effect of the presence of other hermaphrodites  
268 on the number of exophers in a reporter strain.

269 **c** *C. elegans* hermaphrodites grown in the presence of other hermaphrodites produce  
270 fewer exophers than solitary animals. n = 88 and 90; N = 3.

271 **d** Embryo-maternal signaling is not responsible for the differences in exophergenesis  
272 levels as both solitary and accompanied hermaphrodites contain the same number of embryos  
273 *in utero*. n = 88 and 90; N = 3.

274 **e** Schematic representation of the experimental setup for investigating the influence of  
275 increased male presence in the population.

276 **f** Increased percentage of males in the population (via *him-5(e1490)* mutation) leads to a  
277 higher exophergenesis level in hermaphrodites. n = 79 and 83; N = 3

278 **g** Increased percentage of males in the population (via *him-5(e1490)* mutation) causes  
279 embryo retention in hermaphrodites. n = 79 and 85; N = 3

280 **h** Schematic representation of the experimental setup for investigating the influence of  
281 male's secretome on exophergenesis level.

282 **i** Growing hermaphrodites on male-conditioned plates increases exophergenesis levels.  
283 n = 106 and 98; N = 3.

284 **j** Exposing hermaphrodites to male secretome causes embryo retention in the uterus. n =  
285 105 and 98; N = 3.

286 Data information: Scale bars are 20  $\mu\text{m}$  and 5  $\mu\text{m}$  (zoom in). @AD2 means “at adulthood day  
287 2”. Data are presented as median with interquartile range; n represents the number of worms;  
288 N represents a number of experimental repeats that were combined into a single value; ns - not  
289 significant ( $P > 0.1$ ), \*\*\*\*  $P < 0.0001$ ; Mann-Whitney test.

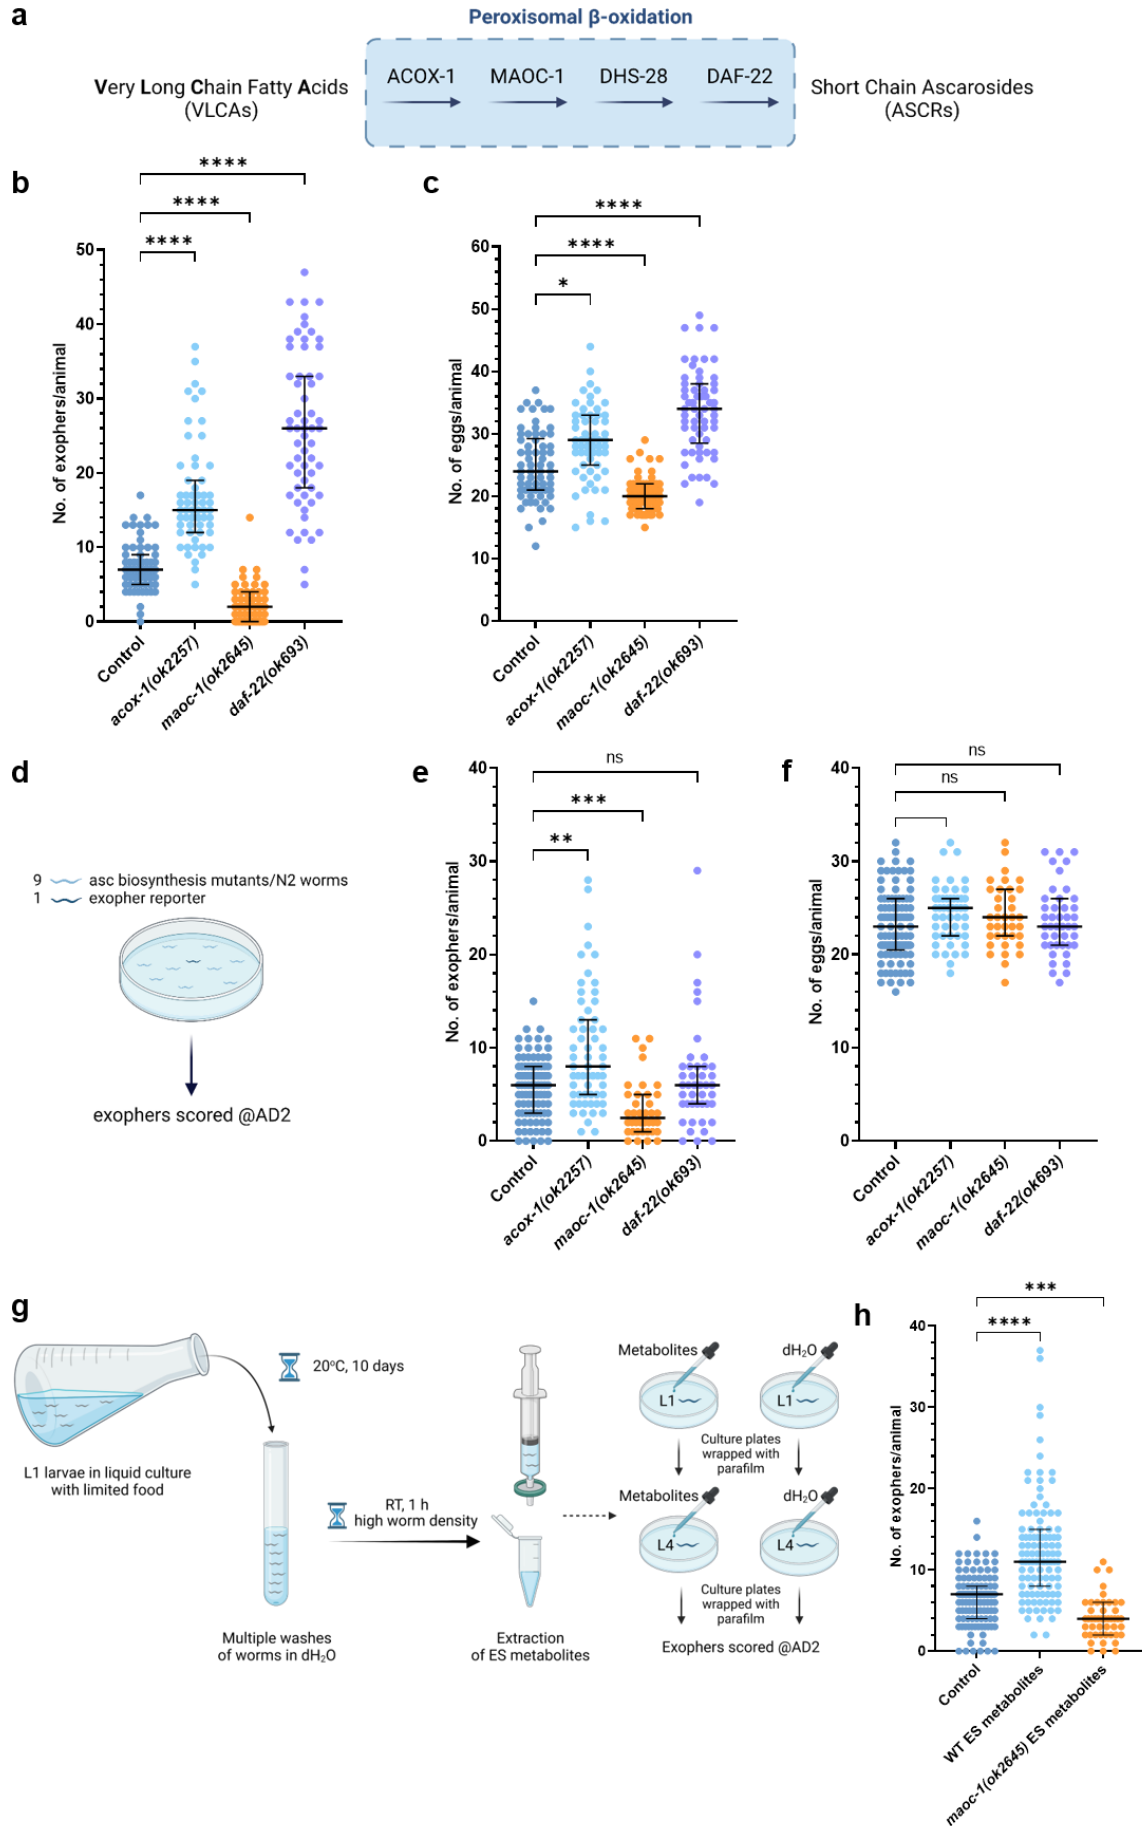

291 **Figure 2. Ascaroside pheromones regulate muscle exopher production.**

292 **a** Ascaroside side-chain biosynthesis.

293 **b** Ascaroside side-chain biosynthesis mutants produce various numbers of exophers. n =

294 59 - 66; N = 3.

295 **c** Mutation in genes encoding ascaroside side-chain biosynthesis enzymes influence *in*

296 *utero* embryo presence. n = 59 - 66; N = 3.

297 **d** Schematic representation of the experimental setup for investigating the influence of

298 ascaroside side-chain biosynthesis mutants presence on exophergenesis level in wild-type

299 worms.

300 **e** Growing wild-type hermaphrodites in the presence of *acox-1(ok2257)* and *maoc-*

301 *1(ok2645)* mutant increase and decrease exopher production, respectively. n = 38 - 93; N = 3.

302 **f** Growing wild-type hermaphrodites with ascaroside side-chain biosynthesis mutants

303 does not influence the number of embryos present in the uterus. n = 37 - 93; N = 3.

304 **g** Schematic overview of the procedure for the isolation of metabolites from starving

305 worms.

306 **h** Exposing worms to metabolites isolated from wild-type and *maoc-1(ok2645)* mutant

307 starving populations oppositely regulate exopher production. n = 107 - 110, and 47 for *maoc-*

308 *1(ok2645)*; N = 3 and N = 2 for *maoc-1(ok2645)*.

309 Data information: @AD2 means “at adulthood day 2”. Data are presented as median with

310 interquartile range; n represents the number of worms; N represents a number of experimental

311 repeats that were combined into a single value; ns - not significant ( $P > 0.1$ ), \*  $P < 0.05$ , \*\*  $P$

312  $< 0.01$ , \*\*\*  $P < 0.001$ , \*\*\*\*  $P < 0.0001$ ; Kruskal-Wallis test with Dunn's multiple comparisons

313 test.

314



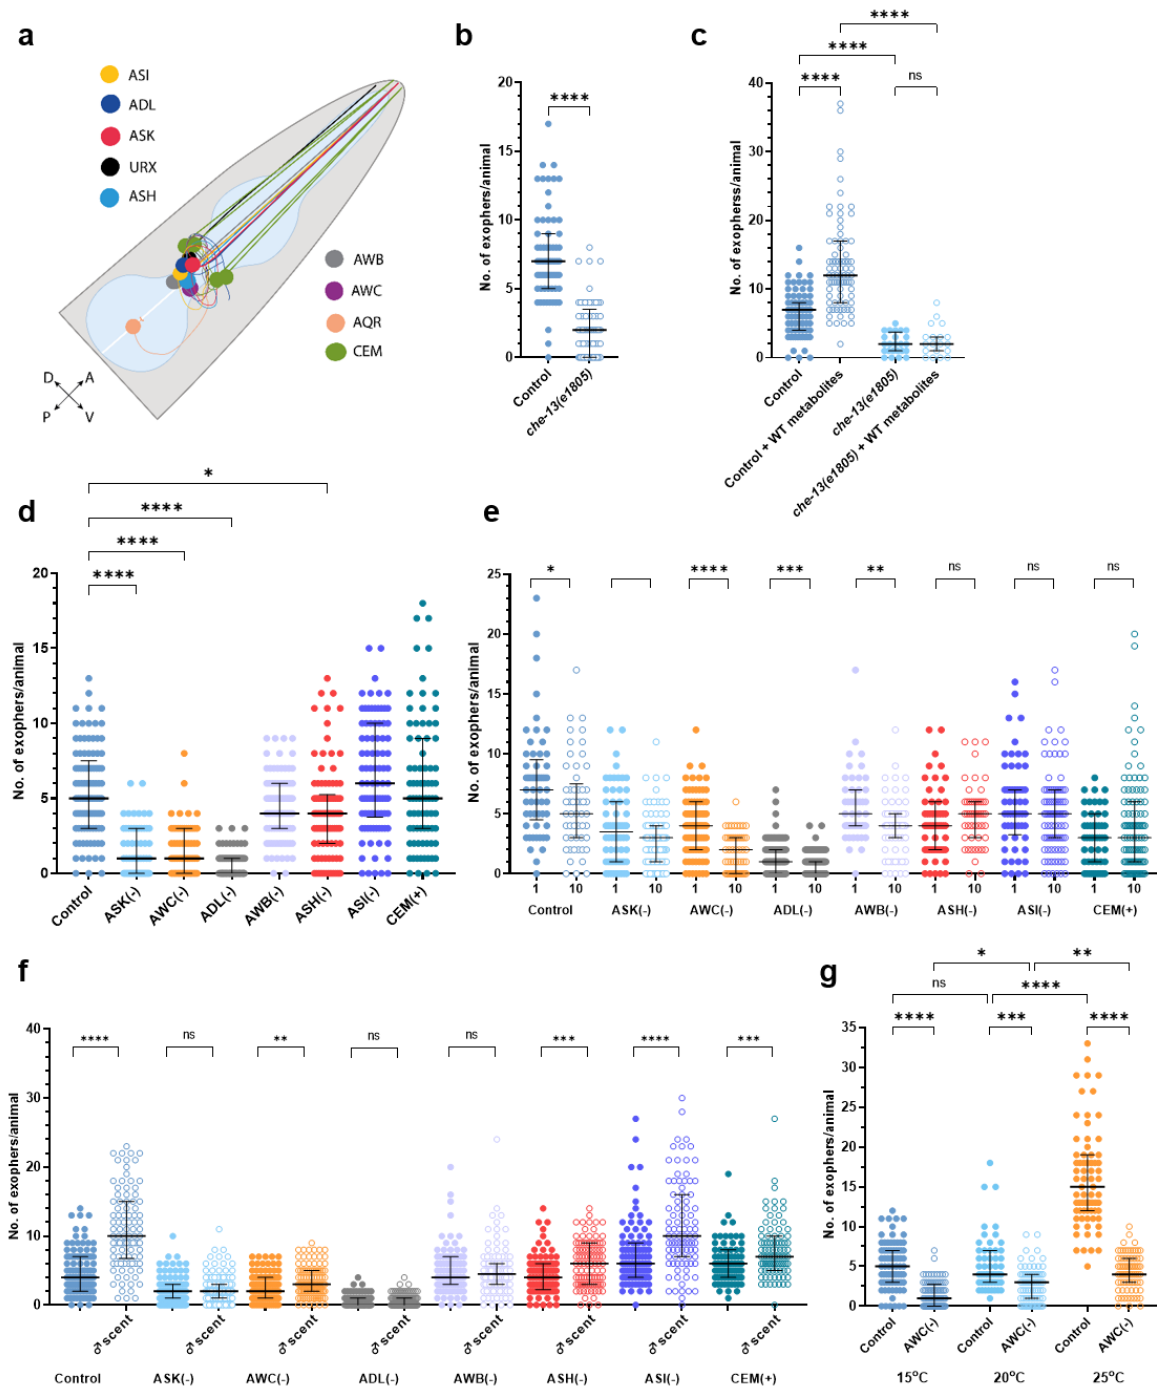

315

316 **Figure 3. Multiple olfactory neurons regulate exoprogenesis levels in response to**  
 317 **hermaphrodite and male pheromones.**

318 **a** Sensory neurons investigated within this study.

319 **b** Hermaphrodites with impaired ciliated sensory neurons have lower exoprogenesis

320 levels. n = 66 and 65; N = 3.

321 **c** Hermaphrodites with impaired ciliated sensory neurons do not produce more exophers  
322 in response to metabolites isolated from wild-type worms. n = 79 for Control and n = 19 - 24  
323 for *che-13(e1805)*; N = 3 and 1, respectively.

324 **d** Genetic ablation of ASK, AWC, ADL, or ASH neurons reduces exopher production. n  
325 = 62 - 97; N = 3.

326 **e** Decrease in exophergenesis level due to exposure to hermaphrodite's pheromones is  
327 mediated by ASH, ASI, and ASK neurons, and can be altered by the addition of CEM male-  
328 specific neurons. n = 49 - 97; N = 3.

329 **f** Increase in exophergenesis levels due to exposure to male's pheromones is mediated  
330 by ASK, AWB, and ADL neurons. n = 77 - 108; N = 3.

331 **g** AWC neurons regulate the temperature-dependent increase in muscle exopher  
332 production. n = 52 - 92; N = 3.

333 Data information: Data are presented as median with interquartile range; n represents the  
334 number of worms; N represents a number of experimental repeats that were combined into a  
335 single value; ns - not significant ( $P > 0.1$ ), \*  $P < 0.05$ , \*\*  $P < 0.01$ , \*\*\*  $P < 0.001$ , \*\*\*\*  $P <$   
336  $0.0001$ ; (b, e, f) Mann-Whitney test, (c, d, g) Kruskal-Wallis test with Dunn's multiple  
337 comparisons test.

338

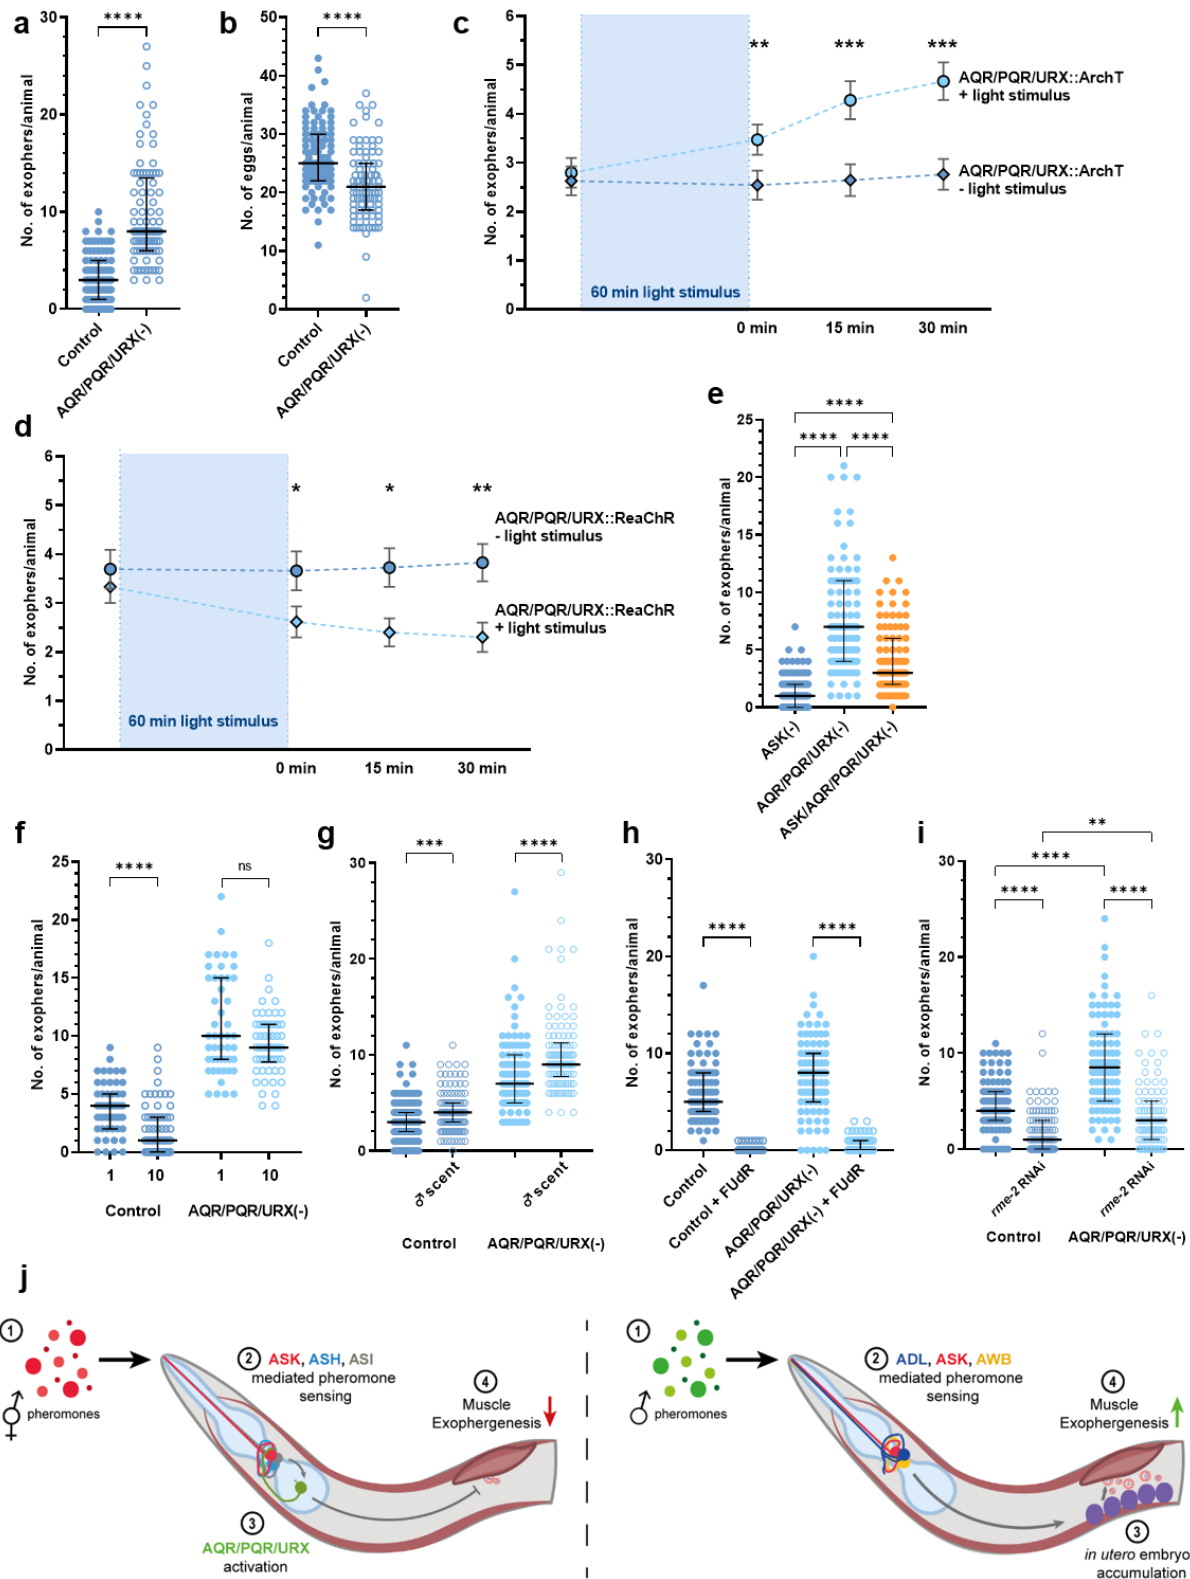

339

340 **Figure 4. Pseudocoelom-exposed neurons negatively regulate exopher production.**

341 **a** Genetic ablation of pseudocoelom-exposed AQR, PQR, and URX neurons increases

342 exopher production. n = 89 and 100; N = 3.

- 343 **b** Genetic ablation of pseudocoelom-exposed AQR, PQR, and URX neurons causes a  
344 decrease in the number of embryos present in the uterus. n = 89 and 100; N = 3.
- 345 **c** ArchT-mediated optogenetic inactivation of AQR, PQR, and URX neurons leads to an  
346 increase in exopher production. n = 59; N = 6.
- 347 **d** ReaChR-mediated optogenetic activation of AQR, PQR, and URX neurons leads to a  
348 decrease in exopher production. n = 59 and 60; N = 6.
- 349 **e** Low exophergenesis level in animals with genetic ablation of ASK neurons and high  
350 level of exophergenesis in animals with genetic ablation of AQR, PQR, and URX neurons are  
351 equalized in animals with all four neurons removed. n = 90 - 106; N = 3.
- 352 **f** Decrease in exophergenesis level due to exposure to hermaphrodite's pheromones is  
353 partially mediated by AQR, PQR, and/or URX neurons. n = 51 - 60; N = 3.
- 354 **g** Increase in exophergenesis levels due to exposure to male pheromones is not altered in  
355 animals with genetic ablation of AQR, PQR, and URX neurons. n = 102 - 105; N = 3.
- 356 **h** Genetic ablation of AQR, PQR, and URX neurons do not rescue the inhibition of  
357 exophergenesis caused by FUdR-mediated worm sterility. n = 89 - 90; N = 3.
- 358 **i** Genetic ablation of AQR, PQR, and URX neurons only partially rescues the inhibition  
359 of exophergenesis caused by *rme-2* (yolk receptor) knockdown. n = 90; N = 3.
- 360 **j** Model for olfaction-dependent regulation of muscle extracellular vesicles formation.  
361 ASK, ASH, and ASI neurons sense hermaphrodite pheromones which leads to muscle  
362 exophergenesis down-regulation through AQR/PQR/URX activation. ASK, AWB, and ADL  
363 sense male pheromones which leads to muscle exophergenesis up-regulation through signaling  
364 derived from *in utero* accumulating embryos.
- 365 Data information: Scale bars are 20  $\mu$ m. Data are presented as median with interquartile range;  
366 n represents the number of worms; N represents a number of experimental repeats that were  
367 combined into a single value; ns - not significant ( $P > 0.1$ ), \*  $P < 0.05$ , \*\*  $P < 0.01$ , \*\*\*  $P <$

368 0.001, \*\*\*\* P < 0.0001; (a, c, d, e, g, h, i) Mann-Whitney test, (f, j) Kruskal-Wallis test with

369 Dunn's multiple comparisons test.

370

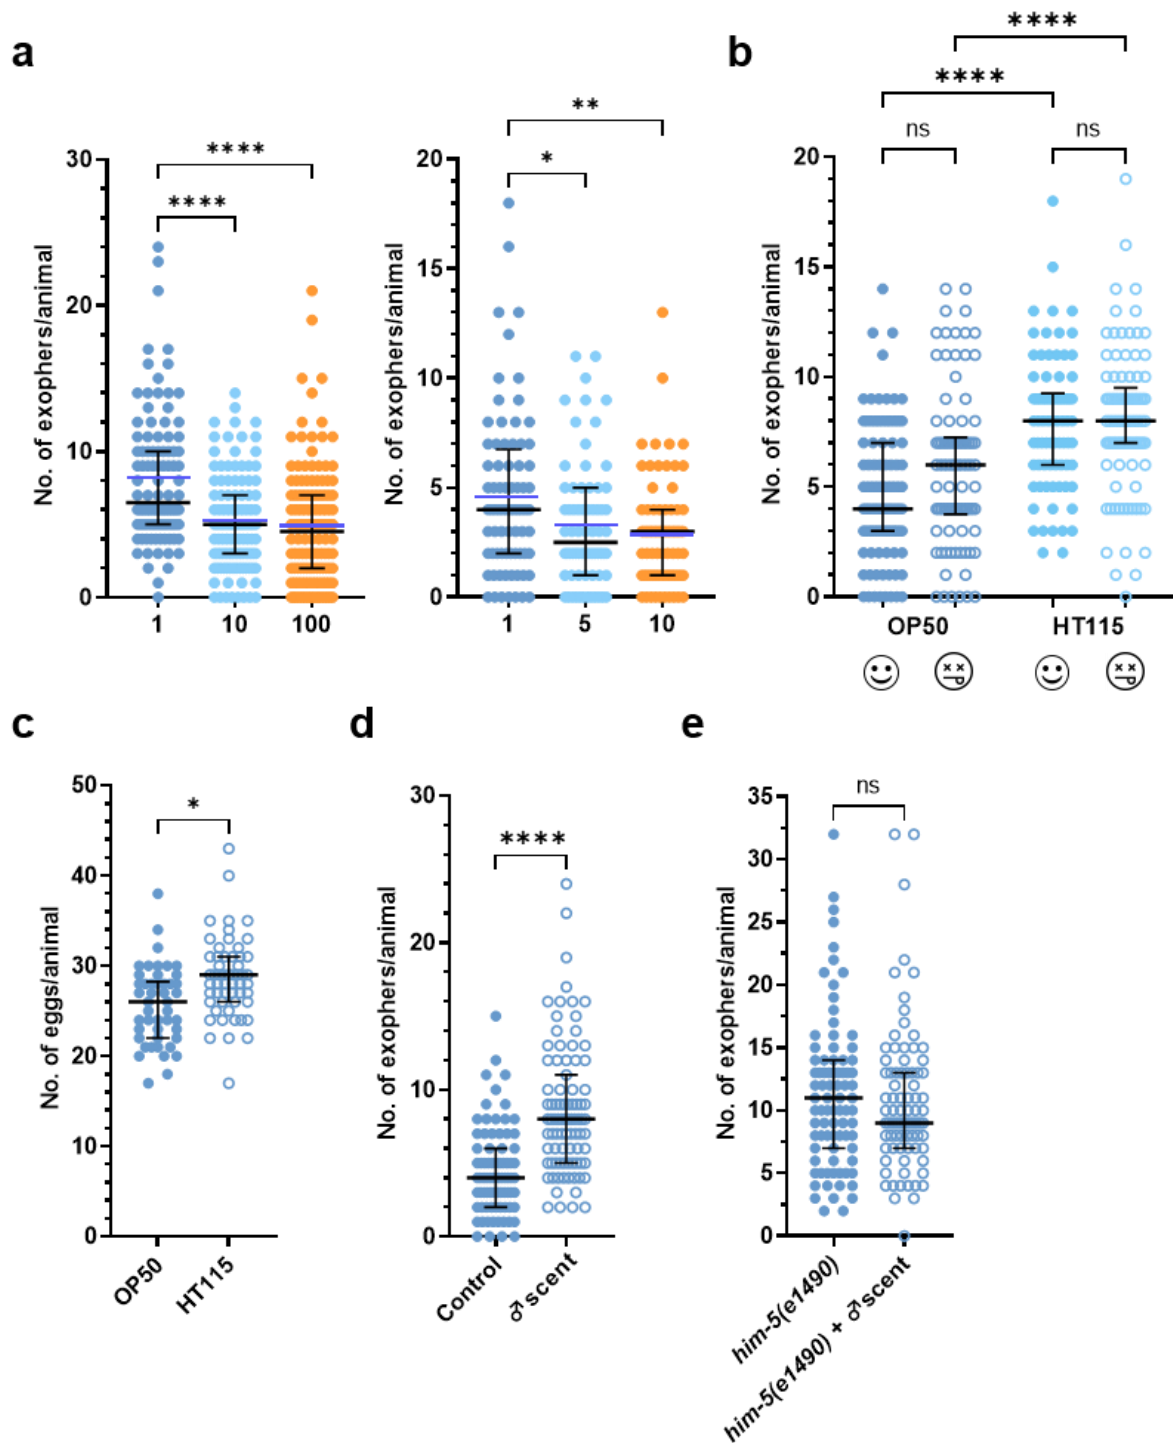

371

372 **Extended Data Figure 1. Influence of worm population composition and bacteria diet on**

373 **muscle exophers formation.**

374 **a** Exopher production is regulated by hermaphrodite-derived metabolites in a dose-  
375 dependent manner. n = 100 - 124 and n= 70 - 76; N = 3.

376 **b** Worms fed with metabolically active and inactive bacteria produce a similar number of  
377 exophers. Worms grown on *E. coli* HT115 strain produce more exophers than worms grown  
378 on *E. coli* OP50 strain. n = 78 - 93; N = 3.

379 **c** Worms grown on *E. coli* HT115 strain contain more eggs *in utero* than worms grown  
380 on *E. coli* OP50 strain. n = 46 and 55; N = 3.

381 **d** Growing hermaphrodites on male-conditioned plates increases exophergenesis levels  
382 regardless of *E. coli* strain used as a food source (HT115 – Fig.1i, OP50 – Extended Data Fig.  
383 1d). n = 79 and 87; N = 3.

384 **e** Exposing hermaphrodites to a male's secretome above the L4 stage does not further  
385 increase exopher production. n = 83; N = 3.

386 Data information: Data are presented as median with interquartile range; violet bars represent  
387 mean value; n represents the number of worms; N represents a number of experimental repeats  
388 that were combined into a single value; ns - not significant ( $P > 0.1$ ), \*  $P < 0.05$ , \*\*  $P < 0.01$ ,  
389 \*\*\*\*  $P < 0.0001$ ; (c, d, e) Mann-Whitney test, (a, b) Kruskal-Wallis test with Dunn's multiple  
390 comparisons test.

391

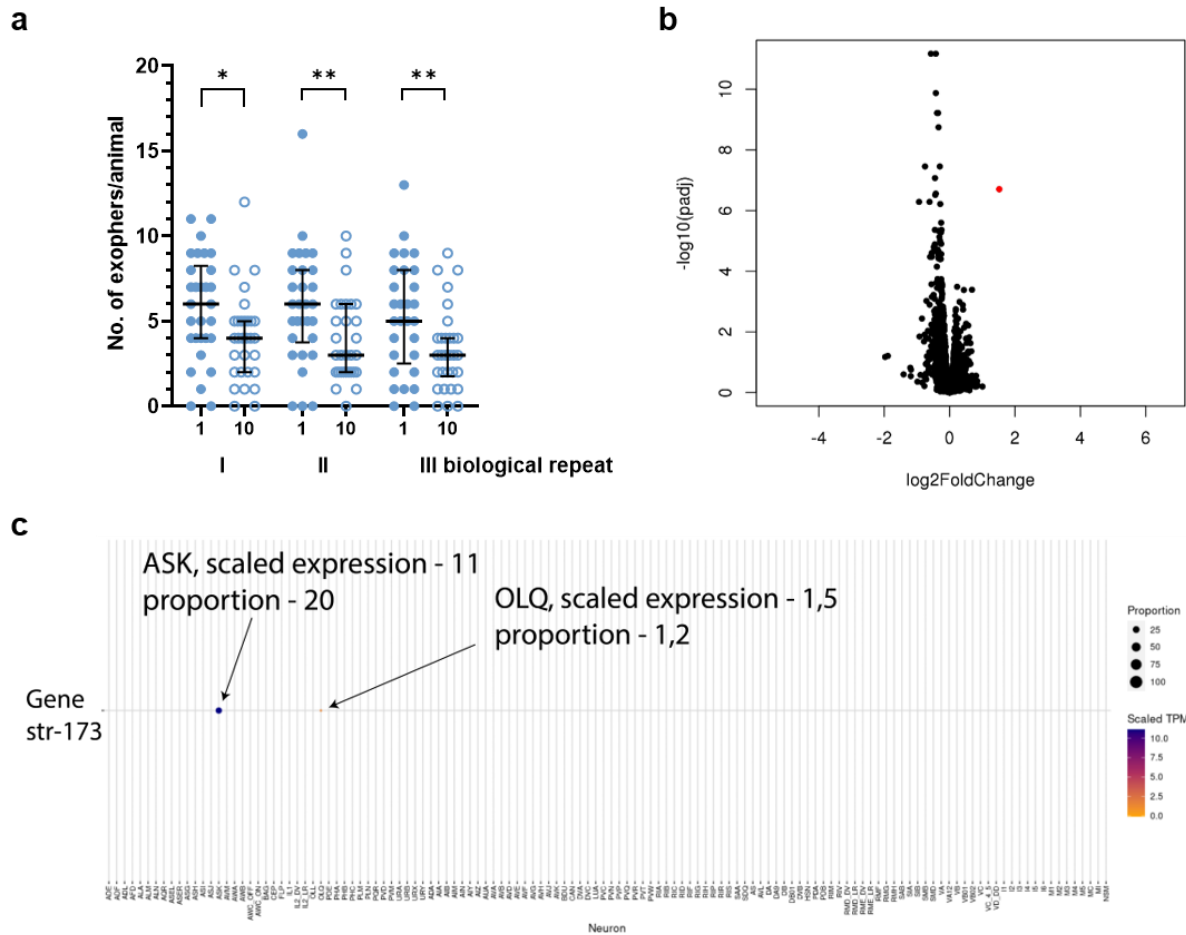

392

393 **Extended Data Figure 2. Worms grown in populations with different densities did not**  
 394 **differ significantly on the transcriptional level.**

395 **a** Number of exophers produced by worms that were used for RNAseq analysis. n = 29 -  
 396 30; N = 3.

397 **b** Worms grown either as a single animal or in a ten-hermaphrodites population did not  
 398 differ significantly on the transcriptional level. Transcript with significant change is marked as  
 399 a red dot.

400 **c** Single-cell RNA-seq data from CeNGENApp<sup>37</sup> show *str-173* strong expression in ASK  
 401 neurons and weak expression in OLQ neurons. Circle diameter represents the proportion of  
 402 neurons in each cluster that express *str-173* gene.

403 Data information: Data are presented as median with interquartile range; n represents the  
404 number of worms; N represents a number of experimental repeats that were combined into a  
405 single value; \*  $P < 0.05$ , \*\*  $P < 0.01$ ; (a) Mann-Whitney test,



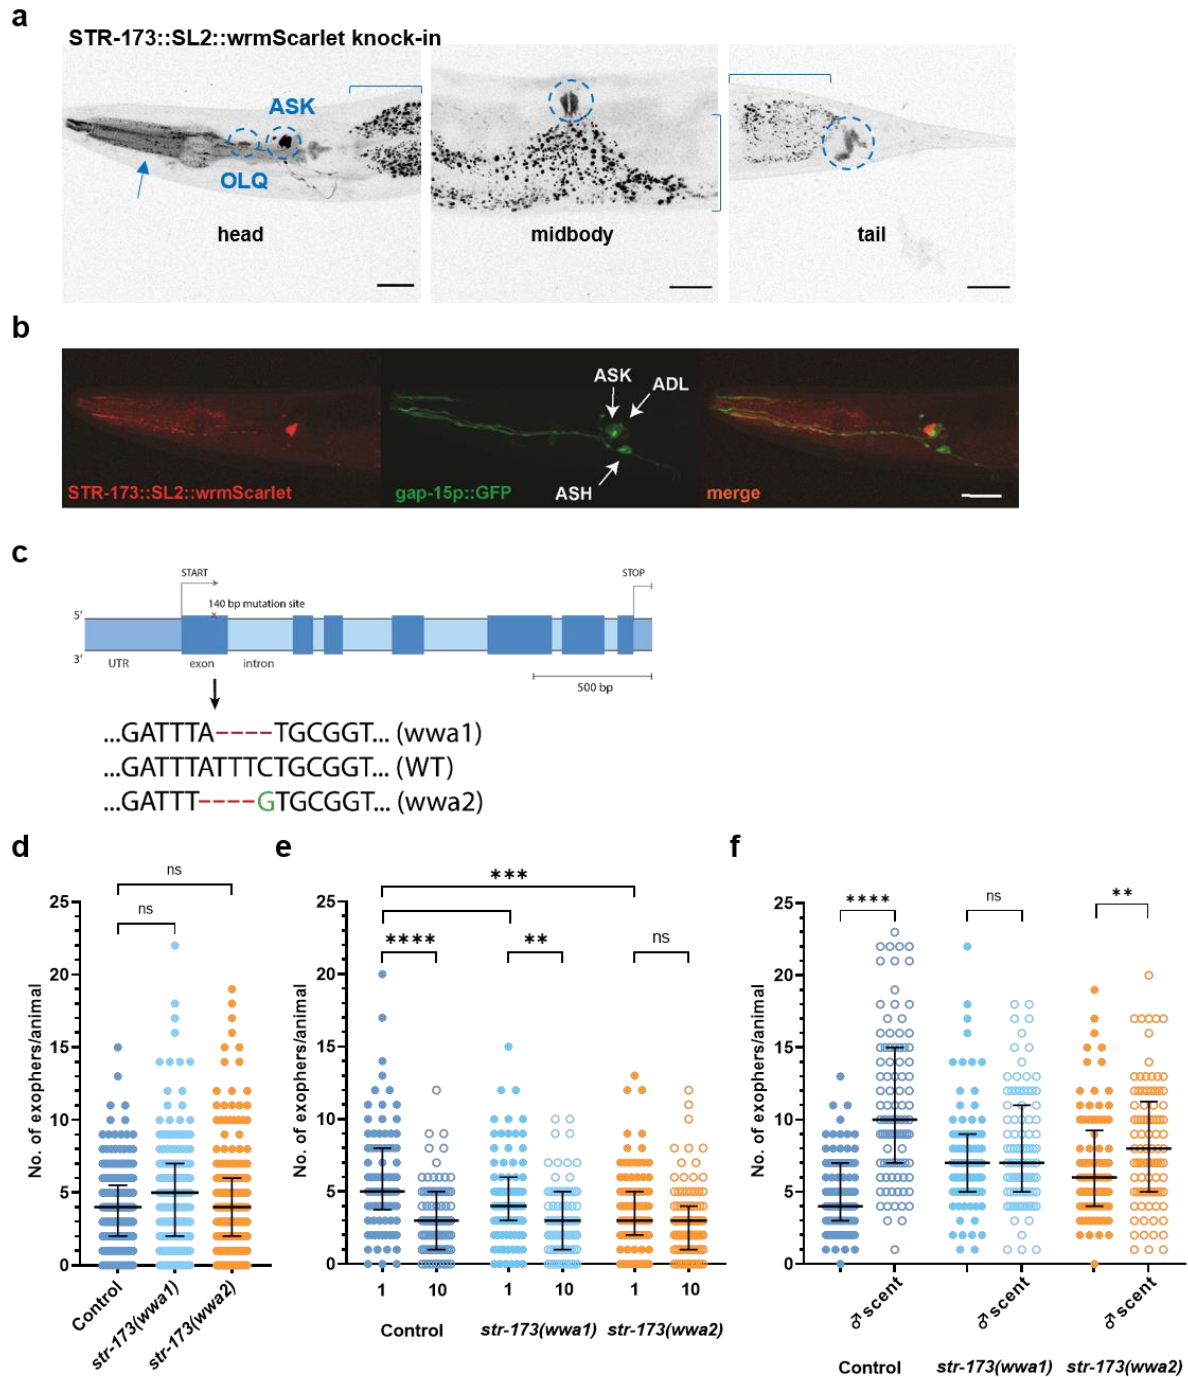

406

407 **Extended Data Figure 3. STR-173 receptor mediates pheromone-dependent**  
 408 **exophogenesis modulation**

409 **a - b** *str-173* 7TM receptor is expressed in neurons (ASK and OLQ(?)) and non-neuronal  
 410 tissues (pharynx marked with an arrow, vulva, and rectal gland(?) marked with circles). Square  
 411 brackets mark gut autofluorescence.

412 **c** Localization of *str-173* mutations in the gene.

413 **d** Basal level of exophergenesis in *str-173* mutants is unchanged compared to wild-type  
414 worms. n = 190 - 208; N = 6.

415 **e** Solitary *str-173* mutants produce a smaller number of exophers compared to wild-type  
416 worms. n = 90; N = 3.

417 **f** Increase in exophergenesis levels due to exposure to male pheromones is partially  
418 dependent on STR-173 7TM receptor. n = 89 - 94; N = 3.

419 Data information: Scale bars are (a) 30  $\mu$ m and (b) 20  $\mu$ m. Data are presented as median with  
420 interquartile range; n represents the number of worms; N represents a number of experimental  
421 repeats that were combined into a single value; ns - not significant ( $P > 0.1$ ), \*\*  $P < 0.01$ , \*\*\*  
422  $P < 0.001$ , \*\*\*\*  $P < 0.0001$ ; (d, e) Kruskal-Wallis test with Dunn's multiple comparisons test,  
423 (f) Mann-Whitney test.

424

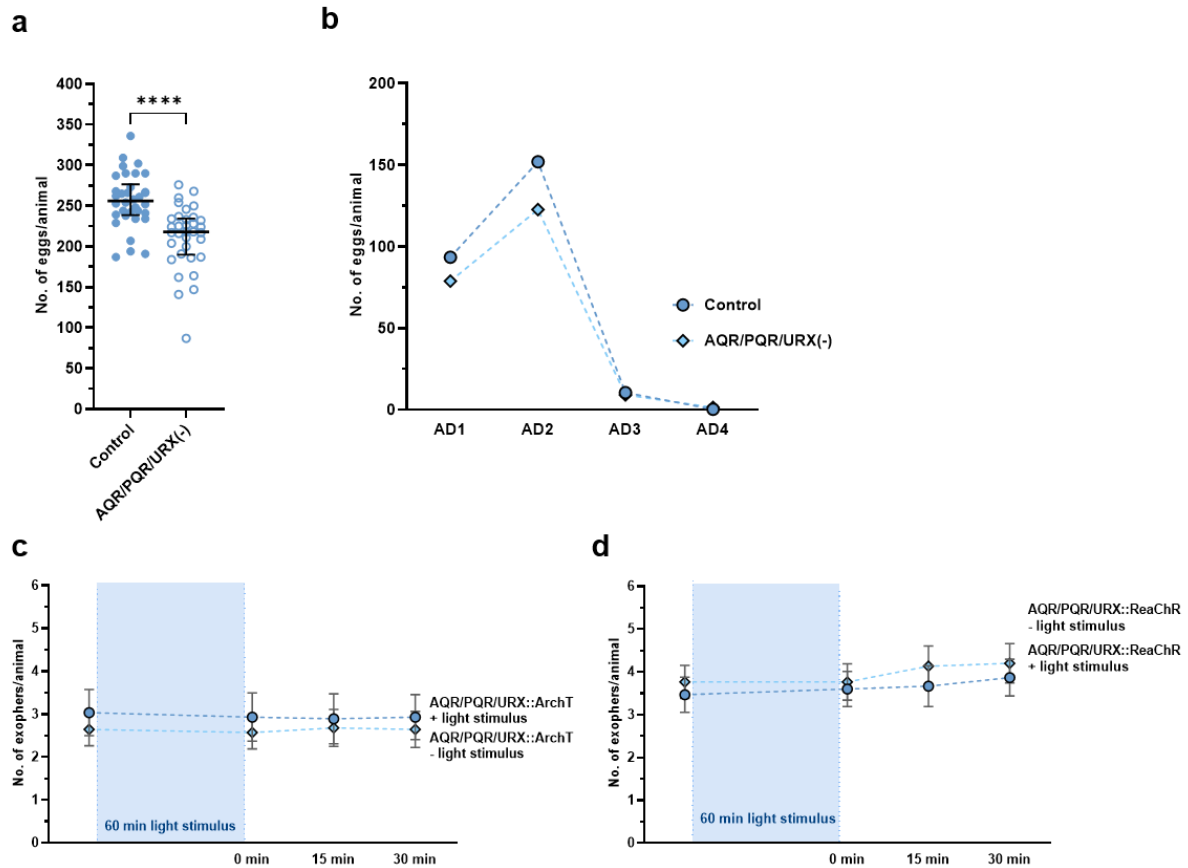

425

426 **Extended Data Figure 4. Worms lacking AQR, PQR, and URX neurons have lower brood**  
427 **size than the wild type.**

428 **a - b** Worms with the genetic ablation of pseudocoelom-exposed AQR, PQR, and URX  
429 neurons have lower brood size than the wild type. n = 34; N = 3.

430 **c** Control experiment without all-trans retinal (ATR) for ArchT-mediated inactivation of  
431 AQR, PQR, and URX neurons. n = 30; N = 3.

432 **d** Control experiment without all-trans retinal (ATR) for ReaChR-mediated activation of  
433 AQR, PQR, and URX neurons. n = 30; N = 3.

434 Data information: Data are presented as median with interquartile range; n represents the  
435 number of worms; N represents a number of experimental repeats that were combined into a  
436 single value; ns - not significant ( $P > 0.1$ ), \*\*\*\*  $P < 0.0001$ ; Mann-Whitney test.

437

438

439 **Supplementary Table 1.**

| Gene.name      | log2FoldChange     | pvalue             | padj      |
|----------------|--------------------|--------------------|-----------|
| srw-86         | 2,470005259        | 0,006089231        | NA        |
| <b>str-173</b> | <b>1,210254202</b> | <b>0,083872612</b> | <b>NA</b> |
| sri-39         | 0,961870706        | 0,118312493        | NA        |
| srm-1          | 0,74631012         | 0,197705915        | NA        |
| srh-269        | 0,715357507        | 0,20128121         | NA        |
| sri-36         | 0,697436016        | 0,069365061        | NA        |
| str-55         | 0,69275127         | 0,286227955        | NA        |
| srd-64         | 0,671778641        | 0,227938718        | NA        |
| srsx-36        | 0,632246484        | 0,436691291        | NA        |
| sri-57         | 0,609273781        | 0,193809518        | NA        |
| srw-89         | 0,578848267        | 0,407242411        | NA        |
| srbc-82        | 0,56597091         | 0,423856002        | NA        |
| srr-2          | 0,523068614        | 0,103943944        | NA        |
| srx-97         | 0,505797282        | 0,424229255        | NA        |
| sri-11         | 0,489747472        | 0,297473585        | NA        |
| srv-15         | 0,463355568        | 0,372243301        | NA        |
| srj-14         | 0,460503239        | 0,065003699        | NA        |
| sre-36         | 0,458443613        | 0,346744567        | NA        |
| srh-217        | 0,429350684        | 0,444951979        | NA        |
| srh-2          | 0,409544299        | 0,241263936        | NA        |
| srx-41         | 0,39088958         | 0,531069383        | NA        |
| srr-10         | 0,382508507        | 0,600239609        | NA        |
| srz-97         | 0,370702424        | 0,498470233        | NA        |
| srsx-19        | 0,353102397        | 0,54270153         | NA        |

|         |             |             |             |
|---------|-------------|-------------|-------------|
| srd-70  | 0,320458039 | 0,541451057 | NA          |
| srh-71  | 0,308999771 | 0,434944825 | NA          |
| str-179 | 0,291901118 | 0,596460956 | NA          |
| str-148 | 0,267146531 | 0,651806161 | NA          |
| sra-35  | 0,258242663 | 0,576292957 | NA          |
| srx-45  | 0,226491874 | 0,636877507 | NA          |
| srsx-27 | 0,225810039 | 0,724940673 | NA          |
| srr-6   | 0,223992203 | 0,491120033 | NA          |
| srb-16  | 0,213930895 | 0,686266407 | NA          |
| sri-55  | 0,204504014 | 0,648957813 | NA          |
| srx-125 | 0,196087663 | 0,632165424 | NA          |
| srw-48  | 0,1760458   | 0,784611201 | NA          |
| sri-35  | 0,174186697 | 0,816308334 | NA          |
| srsx-25 | 0,172603337 | 0,699023544 | NA          |
| stj-29  | 0,145173827 | 0,82575966  | NA          |
| str-176 | 0,145080793 | 0,381737839 | 0,705706926 |
| srv-32  | 0,140744356 | 0,836820773 | NA          |
| stj-52  | 0,12758145  | 0,8360209   | NA          |
| srab-4  | 0,123433522 | 0,75301419  | NA          |
| srx-14  | 0,122166676 | 0,825629763 | NA          |
| src-1   | 0,121226527 | 0,017785109 | 0,153059765 |
| srr-4   | 0,118248088 | 0,143496801 | 0,45832863  |
| srsx-34 | 0,118146738 | 0,517657949 | NA          |
| str-144 | 0,115566741 | 0,882522042 | NA          |
| sri-8   | 0,114856655 | 0,747072742 | NA          |
| srh-48  | 0,107505544 | 0,732564142 | NA          |
| str-245 | 0,085385814 | 0,731316789 | NA          |

|         |              |             |             |
|---------|--------------|-------------|-------------|
| srv-7   | 0,081868619  | 0,676931931 | NA          |
| srj-9   | 0,057842686  | 0,909552581 | NA          |
| sra-33  | 0,04490344   | 0,924342693 | NA          |
| srsx-18 | 0,037063376  | 0,9551973   | NA          |
| src-2   | 0,006822308  | 0,971252278 | NA          |
| srr-1   | 0,00459541   | 0,99125387  | NA          |
| sri-59  | 0,000405882  | 0,999217048 | NA          |
| srg-34  | -0,030080578 | 0,947775572 | NA          |
| str-172 | -0,085472421 | 0,87286706  | NA          |
| srr-3   | -0,088516378 | 0,76868265  | NA          |
| srd-32  | -0,107551827 | 0,816267341 | NA          |
| srv-1   | -0,11334895  | 0,410156047 | 0,727497177 |
| srh-237 | -0,151085831 | 0,175026351 | 0,503664735 |
| str-183 | -0,178110179 | 0,787945578 | NA          |
| sra-10  | -0,178642194 | 0,779315606 | NA          |
| sra-32  | -0,190091468 | 0,685526539 | NA          |
| srd-14  | -0,207486411 | 0,305360875 | NA          |
| sre-13  | -0,210537797 | 0,702655411 | NA          |
| srd-52  | -0,235477439 | 0,677464298 | NA          |
| sri-40  | -0,247157736 | 0,037111528 | 0,232197335 |
| srz-85  | -0,247831631 | 0,640803343 | NA          |
| sra-14  | -0,266593158 | 0,200655026 | NA          |
| srh-16  | -0,275054658 | 0,57204149  | NA          |
| srh-70  | -0,322126344 | 0,575669232 | NA          |
| srab-14 | -0,328373116 | 0,605637275 | NA          |
| srx-12  | -0,361291214 | 0,429781376 | NA          |
| sre-9   | -0,397855081 | 0,275566108 | NA          |

|         |              |             |    |
|---------|--------------|-------------|----|
| srx-58  | -0,458521562 | 0,487282023 | NA |
| sri-5   | -0,458897325 | 0,308597251 | NA |
| srt-23  | -0,460153207 | 0,606235802 | NA |
| srm-3   | -0,470085367 | 0,174616055 | NA |
| srh-33  | -0,479357546 | 0,48607886  | NA |
| srh-105 | -0,486191119 | 0,439431381 | NA |
| srw-35  | -0,492290252 | 0,480189518 | NA |
| srx-118 | -0,521178132 | 0,380103143 | NA |
| srm-5   | -0,557246057 | 0,448970879 | NA |
| srd-53  | -0,588697815 | 0,325322641 | NA |
| str-168 | -0,611511779 | 0,293797037 | NA |
| sre-4   | -0,659337898 | 0,279814818 | NA |
| srx-98  | -0,789769153 | 0,126804165 | NA |
| srt-39  | -0,803397597 | 0,204138417 | NA |
| srz-99  | -0,866876045 | 0,048915705 | NA |
| sre-44  | -1,105518367 | 0,091985454 | NA |

441 **Materials and Methods**

442 **Reagents and Tools table**

| <b>Reagent or Resource</b>                           | <b>Source</b>                  | <b>Identifier</b>                            |
|------------------------------------------------------|--------------------------------|----------------------------------------------|
| <b>Bacterial and Virus Strains</b>                   |                                |                                              |
| <i>Escherichia coli</i> RNAi feeding strain          | Caenorhabditis Genetics Center | HT115(DE3)                                   |
| <i>E. coli</i> feeding strain                        | Caenorhabditis Genetics Center | OP50                                         |
| Ahringer RNAi library                                | Source BioScience              | <i>C. elegans</i> RNAi Collection (Ahringer) |
| <b>Chemicals, Peptides, and Recombinant Proteins</b> |                                |                                              |
| All-trans retinal                                    | Sigma-Aldrich                  | R2500                                        |
| Bacto Agar                                           | BioShop                        | AGR001.1                                     |



|                                       |               |           |
|---------------------------------------|---------------|-----------|
| Bacto Peptone                         | BioShop       | PEP403.1  |
| Bacto Tryptone                        | BioShop       | TRP402.1  |
| Sodium Chloride                       | Chempur       | 117941206 |
| Streptomycin sulfate salt             | Sigma-Aldrich | S6501     |
| Nystatin suspension<br>10,000 unit/mL | Sigma-Aldrich | N1638     |
| Carbenicillin disodium<br>salt        | Roth          | 6344.2    |
| Magnesium Sulfate<br>heptahydrate     | Sigma-Aldrich | M5921     |
| Potassium dihydrogen<br>phosphate     | Roth          | 3904.1    |

|                                 |                          |            |
|---------------------------------|--------------------------|------------|
| di-potassium hydrogen phosphate | Roth                     | P749.1     |
| Calcium Chloride (dihydrate)    | BioShop                  | CCL444.500 |
| Cholesterol                     | BioShop                  | CHL500.5   |
| Tetracycline HCl                | BioShop                  | TET701     |
| IPTG                            | BioShop                  | IPT001     |
| Polystyrene microspheres        | Polysciences Europe GmbH | 08691-10   |
| Tetramisole hydrochloride       | Sigma-Aldrich            | L9756      |
| Paraformaldehyde                | Sigma-Aldrich            | 158127     |

|                                                                                                          |                               |                   |                                                                              |
|----------------------------------------------------------------------------------------------------------|-------------------------------|-------------------|------------------------------------------------------------------------------|
| 5-Fluoro-2'-<br>deoxyuridine                                                                             | Sigma-Aldrich                 | F0503             |                                                                              |
| Sodium hypochlorite<br>solution 14%                                                                      | VWR                           | 27900             |                                                                              |
| <b><i>Caenorhabditis elegans</i> strains</b>                                                             |                               |                   |                                                                              |
| <b>Genotype</b>                                                                                          | <b>Source</b>                 | <b>Identifier</b> | <b>Description</b>                                                           |
| <i>wacIs1[myo-3p::rpn-5<br/>CAI = 0.97::GGGGS<br/>Linker-wrmScarlet::unc-<br/>54 3'UTR, unc-119(+)]</i>  | This paper                    | Strain<br>ACH81   | Strain with<br>muscle exopher<br>RFP marker in<br>N2 wild-type<br>background |
| <i>wacIs1[myo-3p::rpn-5<br/>CAI = 0.97::GGGGS<br/>Linker-wrmScarlet::unc-<br/>54 3'UTR, unc-119(+)],</i> | Turek <i>et al.</i> ,<br>2021 | Strain<br>ACH93   | Strain with<br>muscle exopher<br>RFP and<br>mitochondrial                    |

|                                                                                                                                                                                                  |                   |                          |                                                                                                              |
|--------------------------------------------------------------------------------------------------------------------------------------------------------------------------------------------------|-------------------|--------------------------|--------------------------------------------------------------------------------------------------------------|
| <p><i>wacIs14[myo-3 promoter::tomm-20_1-50aa::attB5::mGFP::unc-54-3'UTR, unc-119(+)]</i></p>                                                                                                     |                   |                          | <p>GFP marker in N2 wild-type background</p>                                                                 |
| <p><i>daf-22(ok693)</i></p>                                                                                                                                                                      | <p>CGC</p>        | <p>Strain<br/>RB859</p>  |                                                                                                              |
| <p><i>wacIs1[myo-3p::rpn-5 CAI = 0.97::GGGGS Linker-wrmScarlet::unc-54 3'UTR, unc-119(+)], wacIs14[myo-3 promoter::tomm-20_1-50aa::attB5::mGFP::unc-54-3'UTR, unc-119(+)]; daf-22(ok693)</i></p> | <p>This paper</p> | <p>Strain<br/>WOP456</p> | <p>Strain with muscle exopher RFP and mitochondrial GFP marker in <i>daf-22(ok693)</i> mutant background</p> |
| <p><i>acox-1(ok2257)</i></p>                                                                                                                                                                     | <p>CGC</p>        | <p>Strain<br/>VC1785</p> |                                                                                                              |

|                                                                                                                                                                                                           |                   |                      |                                                                                                               |
|-----------------------------------------------------------------------------------------------------------------------------------------------------------------------------------------------------------|-------------------|----------------------|---------------------------------------------------------------------------------------------------------------|
| <p><i>wacIs1[myo-3 promoter::rpn-5 CAI=0.97::GGGGS Linker-wrmScarlet::unc-54 3'UTR, unc-119(+)], wacIs14[myo-3 promoter::tomm-20_1-50aa::attB5::mGFP::unc-54-3'UTR, unc-119(+)]; acox-1(ok2257) I</i></p> | <p>This paper</p> | <p>Strain TUR7</p>   | <p>Strain with muscle exopher RFP and mitochondrial GFP marker in <i>acox-1(ok2257)</i> mutant background</p> |
| <p><i>maoc-1&amp;E04F6.6(ok2645) II.</i></p>                                                                                                                                                              | <p>CGC</p>        | <p>Strain RB2000</p> |                                                                                                               |
| <p><i>wacIs1[myo-3 promoter::rpn-5 CAI=0.97::GGGGS Linker-wrmScarlet::unc-54 3'UTR, unc-119(+)]; maoc-1&amp;E04F6.6(ok2645) II</i></p>                                                                    | <p>This paper</p> | <p>Strain TUR46</p>  | <p>Strain with muscle exopher RFP marker in <i>maoc-1&amp;E04F6.6(ok2645)</i> mutant background</p>           |

|                                                                                                                                                                                                                |                   |                         |                                                                                                              |
|----------------------------------------------------------------------------------------------------------------------------------------------------------------------------------------------------------------|-------------------|-------------------------|--------------------------------------------------------------------------------------------------------------|
| <p><i>wacIs1[myo-3 promoter::rpn-5 CAI=0.97::GGGGS Linker-wrmScarlet::unc-54 3'UTR, unc-119(+)], wacIs14[myo-3 promoter::tomm-20_1-50aa::attB5::mGFP::unc-54-3'UTR, unc-119(+)]; che-13(e1805)</i></p>         | <p>This paper</p> | <p>Strain<br/>TUR11</p> | <p>Strain with muscle exopher RFP and mitochondrial GFP marker in <i>che-13(e1805)</i> mutant background</p> |
| <p><i>wacIs1[myo-3 promoter::rpn-5 CAI=0.97::GGGGS Linker-wrmScarlet::unc-54 3'UTR, unc-119(+)], wacIs14[myo-3 promoter::tomm-20_1-50aa::attB5::mGFP::unc-54-3'UTR, unc-119(+)]; qrIs2 [sra-9::mCasp1]</i></p> | <p>This paper</p> | <p>Strain<br/>TUR16</p> | <p>Strain with muscle exopher RFP, mitochondrial GFP marker, and ASK neuron genetic ablation</p>             |

|                                                                                                                                                                                                           |                   |                          |                                                                                                  |
|-----------------------------------------------------------------------------------------------------------------------------------------------------------------------------------------------------------|-------------------|--------------------------|--------------------------------------------------------------------------------------------------|
| <p><i>wacIs1[myo-3 promoter::rpn-5 CAI=0.97::GGGGS Linker-wrmScarlet::unc-54 3'UTR, unc-119(+)], wacIs14[myo-3 promoter::tomm-20_1-50aa::attB5::mGFP::unc-54-3'UTR, unc-119(+)]; hlh-4(tm604) III</i></p> | <p>This paper</p> | <p>Strain<br/>TUR75</p>  | <p>Strain with muscle exopher RFP, mitochondrial GFP marker, and ADL neuron genetic ablation</p> |
| <p><i>wacIs1[myo-3 promoter::rpn-5 CAI=0.97::Optimal Linker-wrmScarlet::unc-54 3'UTR, unc-119(+)]; oyIs85 [ceh-36p::TU#813 + ceh-36p::TU#814 + srtx-1p::GFP + unc-122p::dsRed]</i></p>                    | <p>This paper</p> | <p>Strain<br/>WOP499</p> | <p>Strain with muscle exopher RFP, mitochondrial GFP marker, and AWC neuron genetic ablation</p> |

|                                                                                                                                                                                                                                                                     |                   |                         |                                                                                                  |
|---------------------------------------------------------------------------------------------------------------------------------------------------------------------------------------------------------------------------------------------------------------------|-------------------|-------------------------|--------------------------------------------------------------------------------------------------|
| <p><i>wacIs1[myo-3 promoter::rpn-5 CAI=0.97::GGGGS Linker-wrmScarlet::unc-54 3'UTR, unc-119(+)], wacIs14[myo-3 promoter::tomm-20_1-50aa::attB5::mGFP::unc-54-3'UTR, unc-119(+)]; oyIs84 [gpa-4p::TU#813 + gcy-27p::TU#814 + gcy-27p::GFP + unc-122p::DsRed]</i></p> | <p>This paper</p> | <p>Strain<br/>TUR49</p> | <p>Strain with muscle exopher RFP, mitochondrial GFP marker, and ASI neuron genetic ablation</p> |
| <p><i>wacIs1[myo-3 promoter::rpn-5 CAI=0.97::GGGGS Linker-wrmScarlet::unc-54 3'UTR, unc-119(+)], wacIs14[myo-3 promoter::tomm-20_1-50aa::attB5::mGFP::un</i></p>                                                                                                    | <p>This paper</p> | <p>Strain<br/>TUR47</p> | <p>Strain with muscle exopher RFP, mitochondrial GFP marker, and ASH neuron genetic ablation</p> |



|                                                                                                                                                                                                                                                       |                   |                         |                                                                                                  |
|-------------------------------------------------------------------------------------------------------------------------------------------------------------------------------------------------------------------------------------------------------|-------------------|-------------------------|--------------------------------------------------------------------------------------------------|
| <p><i>c-54-3'UTR, unc-119(+)</i>]; <i>peIs1713 [sra-6p::mCasp-1 + unc-122p::mCherry]</i></p>                                                                                                                                                          |                   |                         |                                                                                                  |
| <p><i>wacIs1[myo-3 promoter::rpn-5 CAI=0.97::GGGGS Linker-wrmScarlet::unc-54 3'UTR, unc-119(+)]</i>,<br/><i>wacIs14[myo-3 promoter::tomm-20_1-50aa::attB5::mGFP::unc-54-3'UTR, unc-119(+)]</i>; <i>peIs1715 [str-1p::mCasp-1 + unc-122p::GFP]</i></p> | <p>This paper</p> | <p>Strain<br/>TUR51</p> | <p>Strain with muscle exopher RFP, mitochondrial GFP marker, and AWB neuron genetic ablation</p> |
| <p><i>wacIs1[myo-3 promoter::rpn-5 CAI=0.97::GGGGS Linker-wrmScarlet::unc-54 3'UTR, unc-119(+)]</i>,</p>                                                                                                                                              | <p>This paper</p> | <p>Strain<br/>TUR18</p> | <p>Hermaphrodites of this strain have muscle exopher RFP, mitochondrial</p>                      |

|                                                                                                                                                            |                   |                         |                                                                                            |
|------------------------------------------------------------------------------------------------------------------------------------------------------------|-------------------|-------------------------|--------------------------------------------------------------------------------------------|
| <p><i>wacIs14[myo-3 promoter::tomm-20_1-50aa::attB5::mGFP::unc-54-3'UTR, unc-119(+)]nIs133 [pkd-2::GFP] I, ceh-30(n3714) X</i></p>                         |                   |                         | <p>GFP marker, and contain CEM male-specific ciliated sensory neurons</p>                  |
| <p><i>wacIs1[myo-3 promoter::rpn-5 CAI=0.97::GGGGS Linker-wrmScarlet::unc-54 3'UTR, unc-119(+)], qals2241[gcy-36::egl-1 + gcy-35::GFP + lin-15(+)]</i></p> | <p>This paper</p> | <p>Strain<br/>TUR37</p> | <p>Strain with muscle exopher RFP marker and AQR/PQR/UR X neurons genetic ablation</p>     |
| <p><i>wacIs1[myo-3 promoter::rpn-5 CAI=0.97::GGGGS Linker-wrmScarlet::unc-54 3'UTR, unc-119(+)], wacIs14[myo-3</i></p>                                     | <p>This paper</p> | <p>Strain<br/>TUR20</p> | <p>Strain with muscle exopher RFP and mitochondrial GFP marker in <i>str-173(wwa1)</i></p> |

|                                                                                                                                                                                                                                 |                   |                         |                                                                                                              |
|---------------------------------------------------------------------------------------------------------------------------------------------------------------------------------------------------------------------------------|-------------------|-------------------------|--------------------------------------------------------------------------------------------------------------|
| <p><i>promoter::tomm-20_1-50aa::attB5::mGFP::unc-54-3'UTR, unc-119(+)]</i>; <i>str-173(wwa1)</i><br/>IV</p>                                                                                                                     |                   |                         | <p>mutant<br/>background</p>                                                                                 |
| <p><i>wacIs1[myo-3 promoter::rpn-5 CAI=0.97::GGGGS Linker-wrmScarlet::unc-54 3'UTR, unc-119(+)]</i>,<br/><i>wacIs14[myo-3 promoter::tomm-20_1-50aa::attB5::mGFP::unc-54-3'UTR, unc-119(+)]</i>; <i>str-173(wwa2)</i><br/>IV</p> | <p>This paper</p> | <p>Strain<br/>TUR21</p> | <p>Strain with muscle exopher RFP and mitochondrial GFP marker in <i>str-173(wwa2)</i> mutant background</p> |
| <p><i>wacIs1[myo-3 promoter::rpn-5 CAI=0.97::GGGGS Linker-wrmScarlet::unc-54 3'UTR, unc-119(+)]</i>,</p>                                                                                                                        | <p>This paper</p> | <p>Strain<br/>TUR59</p> | <p>Strain with muscle exopher RFP and mitochondrial GFP marker in</p>                                        |

|                                                                                                                                                                                                                                                                                                              |                   |                            |                                                                                                                             |
|--------------------------------------------------------------------------------------------------------------------------------------------------------------------------------------------------------------------------------------------------------------------------------------------------------------|-------------------|----------------------------|-----------------------------------------------------------------------------------------------------------------------------|
| <p><i>wacIs14[myo-3 promoter::tomm-20_1-50aa::attB5::mGFP::unc-54-3'UTR, unc-119(+)]</i>; <i>him-5(e1490)</i></p> <p>V</p>                                                                                                                                                                                   |                   |                            | <p><i>him-5(e1490)</i></p> <p>mutant</p> <p>background</p>                                                                  |
| <p><i>wacIs1[myo-3 promoter::rpn-5 CAI=0.97::GGGGS Linker-wrmScarlet::unc-54 3'UTR, unc-119(+)]</i>; <i>wacIs14[myo-3 promoter::tomm-20_1-50aa::attB5::mGFP::unc-54-3'UTR, unc-119(+)]</i>; <i>wwaEx4[gcy-36 promoter::ReaChR::mKate2::unc-54 3'UTR, unc-119(+)]</i>; <i>myo-2 promoter::mNeonGreen]</i></p> | <p>This paper</p> | <p>Strain</p> <p>TUR38</p> | <p>Strain with muscle exopher RFP, mitochondrial GFP marker, and ReaChR for optogenetic activation of AQR, PQR, and URX</p> |

|                                                                                                                                                                                                                                                                                                               |                   |                         |                                                                                                                              |
|---------------------------------------------------------------------------------------------------------------------------------------------------------------------------------------------------------------------------------------------------------------------------------------------------------------|-------------------|-------------------------|------------------------------------------------------------------------------------------------------------------------------|
| <p><i>wacIs1[myo-3 promoter::rpn-5 CAI=0.97::GGGGS Linker-wrmScarlet::unc-54 3'UTR, unc-119(+)];</i><br/> <i>wacIs14[myo-3 promoter::tomm-20_1-50aa::attB5::mGFP::unc-54-3'UTR, unc-119(+)];</i><br/> <i>wwaEx9[gcy-36 promoter::ArchT::mKate2::unc-54 3'UTR, unc-119(+); myo-2 promoter::mNeonGreen]</i></p> | <p>This paper</p> | <p>Strain<br/>TUR43</p> | <p>Strain with muscle exopher RFP, mitochondrial GFP marker, and ArchT for optogenetic inactivation of AQR, PQR, and URX</p> |
| <p><i>str-173(syb6501[<i>str-173::SL2-wrmScarlet</i>])<br/>IV</i></p>                                                                                                                                                                                                                                         | <p>This paper</p> | <p>PHX6501</p>          | <p>Endogenous translational reporter strain for <i>str-173</i> expression</p>                                                |

|                                                                                                                                                                                                                                   |                   |                         |                                                                                                                                                |
|-----------------------------------------------------------------------------------------------------------------------------------------------------------------------------------------------------------------------------------|-------------------|-------------------------|------------------------------------------------------------------------------------------------------------------------------------------------|
| <p><i>str-173(syb6501[<i>str-173::SL2-wrmScarlet</i>])</i><br/><i>IV, pkIs591[dpy-20(+)</i> + <i>gap-15::GFP]</i></p>                                                                                                             | <p>This paper</p> | <p>TUR77</p>            | <p>Endogenous translational reporter strain for <i>str-173</i> expression crossed with strain expressing GFP in ASK, ADL, ASH, PHA, an PHB</p> |
| <p><i>wacIs1[myo-3 promoter::rpn-5 CAI=0.97::GGGGS Linker-wrmScarlet::unc-54 3'UTR, unc-119(+)]</i>,<br/><i>wacIs14[myo-3 promoter::tomm-20_1-50aa::attB5::mGFP::unc-54-3'UTR, unc-119(+)]</i>; <i>qrIs2 [sra-9::mCasp1]</i>;</p> | <p>This paper</p> | <p>Strain<br/>TUR61</p> | <p>Strain with muscle exopher RFP, mitochondrial GFP marker, and ASK/AQR/PQ R/URX neurons genetic ablation</p>                                 |

|                                                                                                                                                                                                                                                                                                                                                                                      |                                            |                          |                                                                                                                                                    |
|--------------------------------------------------------------------------------------------------------------------------------------------------------------------------------------------------------------------------------------------------------------------------------------------------------------------------------------------------------------------------------------|--------------------------------------------|--------------------------|----------------------------------------------------------------------------------------------------------------------------------------------------|
| <p><i>qaIs2241[gcy-36::egl-1</i><br/> <i>+ gcy-35::GFP + lin-</i><br/> <i>15(+)]</i></p>                                                                                                                                                                                                                                                                                             |                                            |                          |                                                                                                                                                    |
| <p><i>wacIs1[myo-3</i><br/> <i>promoter::rpn-5</i><br/> <i>CAI=0.97::GGGGS</i><br/> <i>Linker-wrmScarlet::unc-</i><br/> <i>54 3'UTR, unc-119(+)],</i><br/> <i>wacIs14[myo-3</i><br/> <i>promoter::tomm-20_1-</i><br/> <i>50aa::attB5::mGFP::un</i><br/> <i>c-54-3'UTR, unc-</i><br/> <i>119(+)]; qaIs2241[gcy-</i><br/> <i>36::egl-1 + gcy-</i><br/> <i>35::GFP + lin-15(+)]</i></p> | <p>This paper</p>                          | <p>Strain<br/> TUR62</p> | <p>Strain with<br/> muscle exopher<br/> RFP,<br/> mitochondrial<br/> GFP marker,<br/> and<br/> AQR/PQR/UR<br/> X neurons<br/> genetic ablation</p> |
| <p>wild type</p>                                                                                                                                                                                                                                                                                                                                                                     | <p>Caenorhabditis<br/> Genetics Center</p> | <p>Strain N2</p>         | <p><i>C. elegans</i> wild<br/> isolate</p>                                                                                                         |
| <p><b>Recombinant DNA</b></p>                                                                                                                                                                                                                                                                                                                                                        |                                            |                          |                                                                                                                                                    |

|                                                                                   |                            |         |
|-----------------------------------------------------------------------------------|----------------------------|---------|
| Plasmid: pGLOW77<br>(myo-2<br>promoter::mNeonGreen)                               | Addgene                    | #177338 |
| Plasmid: pAS01 (gcy-36<br>promoter::ReaChR::mKate<br>2-unc-54 3'UTR in<br>pCG150) | This paper                 | N/A     |
| Plasmid: pAS02 (gcy-36<br>promoter::ArchT::mKate<br>2-unc-54 3'UTR in<br>pCG150)  | This paper                 | N/A     |
| Plasmid: pAZ03<br>(mKate2-unc-54 3'UTR<br>in pCG150)                              | This paper                 | N/A     |
| Plasmid: ArchT (ArchT<br>template)                                                | gift from<br>Bringmann Lab | N/A     |



|                                                                   |                                                          |                                |
|-------------------------------------------------------------------|----------------------------------------------------------|--------------------------------|
| Plasmid: ReaChR<br>(ReaChR template)                              | gift from<br>Bringmann Lab                               | N/A                            |
| Plasmid: mKate2-unc-54<br>3'UTR (mKate2-unc-54<br>3'UTR template) | gift from<br>Bringmann Lab                               | N/A                            |
| Plasmid: pMH389 (gcy-<br>36 promoter template)                    | gift from<br>Kapitein Lab                                | N/A                            |
| Plasmid: pCG150                                                   | Addgene                                                  | #17247                         |
| Oligonucleotides                                                  |                                                          |                                |
| Used for <i>acox-1(ok2257)</i><br>genotyping                      | FP1<br>AGTAGAGGC<br>TGACGGGAC<br>TT<br>FP2<br>CTCGCTCGTT | RP<br>GGGCAAATGGACATCAAGG<br>C |

|                                             |                                                                                               |                                                                                  |
|---------------------------------------------|-----------------------------------------------------------------------------------------------|----------------------------------------------------------------------------------|
|                                             | ACCTCGTCA<br>A                                                                                |                                                                                  |
| Used for <i>che-13(e1805)</i><br>genotyping | FP1<br>ATCCGTATT<br>GCTTTGGAG<br>AACGCTGTA<br>FP2<br>GAGTTCATC<br>TGTTCAAGA<br>TGAAGACGC<br>C | RP1<br>TGATGAGTTTCAGAAGAATC<br>CACGCC<br>RP2<br>CAGTGGATGAGCAAGATGA<br>AGATGATGA |
| Used for <i>daf-22(ok693)</i><br>genotyping | FP<br>ACATTTGCC<br>ACGTAGCTG<br>GT                                                            | RP1<br>TGGGCCGAGACAAAGCTTAC<br>RP2<br>GTGGTAAGGGAAAAGCGCA<br>A                   |
| Used for <i>maoc-1(ok2645)</i> genotyping   | FP<br>ACACGTTGT                                                                               | RP1<br>AGTCTTGACCCCATGTGTTG<br>A                                                 |

|                                |                                                                                      |                                                                         |
|--------------------------------|--------------------------------------------------------------------------------------|-------------------------------------------------------------------------|
|                                | ACATCTCTCC<br>CG                                                                     | RP2<br>CAGCAATTGAACCACGTCCA                                             |
| <b>Used for creating pAS01</b> |                                                                                      |                                                                         |
| -gcy-36                        | FP<br><br>TATGACCAT<br>GATTACGCC<br>AAGCTATCT<br>GGCACACTT<br>TTTATTCCA<br>TAAACCTGC | RP<br><br>TTGGCGCGCCCCACTTTGTA<br>CAAGAAAGCTGGGTCCGG<br>ATCCTCCTCCGGATC |
| -ReaChR                        | FP<br><br>AAATTCAA<br>CAAGGGCTA<br>CCCAACAAT<br>GGTCTCCCG<br>TCGTCCATG               | RP<br><br>TTGGCGCGCCCCACTTTGTA<br>CAAGAAAGCTGGGTCCGG<br>ATCCTCCTCCGGATC |

| <b>Used for creating<br/>pAS02</b> |                                                                                             |                                                                                 |
|------------------------------------|---------------------------------------------------------------------------------------------|---------------------------------------------------------------------------------|
| <b>-gcy-36</b>                     | <b>FP</b><br><br>TATGACCAT<br>GATTACGCC<br>AAGCTATCT<br>GGCACACTT<br>TTTATTCCA<br>TAAACCTGC | <b>RP</b><br><br>TTGGAGGGCGATTGGGTCCA<br>TTTTTTGTTGGGTAGCCCTTG<br>TTTGAATTTAC   |
| <b>-ArchT</b>                      | <b>FP</b><br><br>AAATTCAAA<br>CAAGGGCTA<br>CCCAACAAA<br>AAATGGACC<br>CAATCGCCC<br>TC        | <b>RP</b><br><br>TTGGCGCGCCCCACTTTGTA<br>CAAGAAAGCTGGGTTTTTCCT<br>CCTGGCTCTGGGG |
| <b>Software and Algorithms</b>     |                                                                                             |                                                                                 |

|                       |                            |     |
|-----------------------|----------------------------|-----|
| GraphPad Prism 9      | GraphPad<br>Software, Inc. | N/A |
| ZEN                   | Zeiss                      | N/A |
| Office 365            | Microsoft                  | N/A |
| ImageJ                | Wayne Rasband<br>(NIH)     | N/A |
| BioRender             | BioRender.com              | N/A |
| Adobe Illustrator CS6 | Adobe                      | N/A |

443

#### 444 **Methods and Protocols**

#### 445 **Worm maintenance and strains**

446 Worms were maintained on nematode growth medium (NGM) plates seeded with bacteria  
447 *Escherichia coli* OP50 or HT115 at 20°C unless stated otherwise<sup>17</sup> A list of all *C. elegans*  
448 strains used in the study is provided in the table at the beginning of the “Materials and Methods”  
449 section.

#### 450 **Scoring exophers and fluorescence microscopy**

451 For the assessment of exophers number, the protocol described in Turek *et al.* and Banasiak *et*  
452 *al.* (Bio-Protocol, detailed, step-by-step guide) was applied. Briefly, exophers were scored  
453 using stereomicroscope Zeiss Axio Zoom.V16 with filter sets 63 HE and 38 HE. For each  
454 exopher scoring assay, worms were age-synchronized from pretzel-stage embryos, L1 larvae,  
455 or L4 larvae. On adulthood day-2, animals were visualized on NGM plates, and the number of  
456 exophers was counted in each freely moving worm.

457 The representative pictures presented in the manuscript were acquired with an inverted Zeiss  
458 LSM800 laser-scanning confocal microscope with a 40x oil immersion objective. To excite the  
459 GFP and RFP fluorescent proteins, 488- and 561-nm lasers were used. For visualization,  
460 animals were immobilized on 3% agarose pads with 6µl of PolySciences 0.05 µm polystyrene  
461 microspheres or 25 µM tetramisole.

#### 462 **RNA interference assay**

463 RNA interference in *C. elegans* was performed using the standard RNAi feeding method and  
464 RNAi clone<sup>49</sup>, previously described in Turek *et al.*, 2021<sup>8</sup>. Briefly, NGM plates, supplemented  
465 with 12,5µg/ml tetracycline, 100µg/ml ampicillin and 1mM IPTG, were seeded with HT115  
466 *E. coli* bacteria containing dsRNA against the gene of interest. Control group animals were fed  
467 with bacteria containing the empty vector. Age-synchronized pretzel-stage embryos or L1  
468 larvae were placed on freshly prepared plates and cultured until day 2 of adulthood. The age of  
469 the worms was verified at the L4 larvae stage, either younger or older worms were removed  
470 from the experiment.

#### 471 **Pre-conditioning of the plates with *C. elegans* males**

472 50 males from the strain with *him-5(e1490)* mutation were transferred on a fresh, 35 mm NGM  
473 plate with *E. coli* OP50 or HT115 at the L4 developmental stage and older. After 48 hours,

474 males were removed from the plates. L1 larvae were transferred to plates pre-conditioned with  
475 males in a group of 10 animals per plate. For the control group, L1 larvae were transferred to  
476 fresh, 35 mm NGM plates seeded with *E. coli* OP50 or HT115 without pre-conditioning with  
477 males. Worms were cultured up to adulthood day 2 when muscle exophers were counted in  
478 each animal.

#### 479 **Egg retention assay**

480 Firstly, single worms were immobilized with 25  $\mu$ M tetramizole on an NGM, bacteria-free  
481 plate. Secondly, using the stereomicroscope, muscle exophers were counted in each worm. In  
482 the following step, hermaphrodites were exposed to 1.8% hypochlorite solution. When they  
483 dissolved, embryos retained in the uterus were counted.

#### 484 **Metabolic inactivation of bacterial food source**

485 The preparation of plates with a metabolically inactive food source for the worms to determine  
486 its effects on exophogenesis was done according to the protocol described in Beydoun *et al.*,  
487 2021. Briefly, a single colony of *E. coli* HT115 or OP50 was inoculated overnight and then the  
488 bacterial culture was split into two flasks. Next, paraformaldehyde (PFA) was added to a final  
489 concentration of 0.5% in only one of them, and the flask was placed in the 37°C shaking  
490 incubator for 1 h. Afterward, the aliquots were transferred to 50 mL tubes and centrifuged at  
491 approximately 3000  $\times$  g for 20 min and washed with 25 mL of LB five times. Control and PFA-  
492 treated bacteria were later concentrated accordingly and seeded on the NGM plates.

493 As control of PFA treatment, new bacterial cultures in LB were set in the 37°C shaking  
494 incubator overnight to make sure the replication was blocked and there was no bacterial growth.

495 Plates were used for experiments at least 5 days after their preparation to make sure there are  
496 no bacteria-derived metabolites left on plates with PFA-treated *E. coli*. A new batch of bacterial  
497 food source was prepared for each biological repetition.

#### 498 **Brood size quantification**

499 Age synchronized worms were transferred on fresh, 60mm NGM plates with *E. coli* OP50 or  
500 HT115 at the L4 developmental stage, single or two hermaphrodites on each of ten plates per  
501 biological repeat. Worms were transferred to fresh plates every day since adulthood day 1. The  
502 number of eggs laid over the worms' reproductive lifetime was counted manually every day.  
503 The data is presented as the total number of eggs laid by each animal or an average of the total  
504 number of eggs laid by each pair.

#### 505 **Quantifying number of exophers in worms grown in different temperatures**

506 Worms were confronted with a range of physiological temperatures: low – 15°C, optimal –  
507 20°C, and high – 25°C throughout their development until exophers were scored. To compare  
508 the corresponding stages of development at various temperatures, worms were additionally  
509 sorted at the L4 stage. The exopher number was assessed based on the timepoint of maximal  
510 egg laying, approx. 140 h or 78 h from egg hatching at low or high temperatures of  
511 maintenance, respectively. Calculations of timing were based on the *C. elegans* development  
512 timeline at different temperatures<sup>31</sup>.

#### 513 **Culturing worms in different population sizes**

514 L1 larvae were transferred to 35 mm Petri dishes seeded with *E. coli* OP50 or HT115 bacteria  
515 strains (100 µL of bacteria from 10 mL overnight culture grown in 50 mL Erlenmeyer flask)  
516 immediately after hatching as a single larva or in a group of 5, 10 or 100 animals. In total, thirty



517 plates with single worms, six plates with 5 worms, three plates with 10 worms, and one plate  
518 with 100 worms were used per biological repeat.

519 **Quantifying the influence of molecules released by ascaroside biosynthesis mutant on**  
520 **exopher production in wild-type worms**

521 Nine freshly hatched L1 larvae from selected ascaroside biosynthesis mutant strains (*maoc-*  
522 *1(ok2645)*, *daf-22(ok693)*, or *acox-1(ok2257)*) or wild-type hermaphrodites (as a control) were  
523 transferred to fresh NGM plates. Next, one L1 larva of a reporter strain expressing RFP in  
524 BWM was added to each plate and 10 worms in total were grown together.

525 **Isolation of excretory-secretory (ES) metabolites containing ascarosides**

526 Liquid-culture protocol for synchronous dauer formation from Cell Press STAR PROTOCOLS  
527 was applied step-by-step (Hibshman *et al.*, 2020). Larvae enter dauer diapause by day 4-5 and  
528 dauers can be maintained for min. 40 days without a decrease in viability or the ability to  
529 recover. For the convenience of experimental conduct, wild-type and *maoc-1(ok2645)* larvae  
530 were maintained in liquid culture for 11 days before the isolation of excretory-secretory  
531 products.

532 On day 11 of liquid culture, worms were washed several times with S-medium to remove any  
533 possibly remaining debris and finally concentrated to approx. 30,000 dauers/mL. They were  
534 then rinsed three times with water and incubated for one hour on an orbital shaker at room  
535 temperature. After one hour they were centrifuged as described in Kaplan *et al.*<sup>21</sup> and the liquid  
536 with worm excretory-secretory products was filtered on ice through a 0.22 µm filter using a  
537 sterile 1 mL syringe. Extracts were immediately aliquoted per 20 µL, frozen and stored at -  
538 80°C.

539 **Assay with usage of excretory-secretory (ES) metabolites containing ascarosides**

540 Approx. 40 animals were transferred to 60 mm NGM plates seeded with *E. coli* HT115  
541 immediately after hatching. Then, 40  $\mu$ L of excretory-secretory metabolites were applied on  
542 the bacterial lawn and wrapped with parafilm right afterwards. In control plates, water was  
543 used instead. Worms' synchronous growth was monitored at the L4 stage when an additional  
544 20  $\mu$ L of ES metabolites or water was administered.

#### 545 **Generation of *str-173* mutant strains**

546 The *str-173* gene mutants (*str-173(wwa1)* and *str-173(wwa2)*) were generated using  
547 CRISPR/Cas9 method as previously described<sup>50</sup>. The crRNA sequence used was  
548 ATAATTGGTGGATATACAAATGG. The *str-173* gene locus was sequenced and deletions  
549 were mapped to the first exon (Extended Data Figure 3d). Both mutations cause frame shifts,  
550 therefore, are most likely molecular null alleles.

#### 551 **Generation of optogenetic strains**

552 Optogenetic strains created for this paper contain red-shifted Channel Rhodopsin (ReaChR) or  
553 archaerhodopsin from Halorubrum strain TP009 (ArchT). To generate these strains, firstly,  
554 mKate2-unc-54 3'UTR was amplified from the template and cloned into pCG150 to create  
555 pAZ03 plasmid. Next, *gcy-36* promoter was amplified from pMH389, ReaChR and ArchT  
556 were amplified from respective templates. The *gcy-36* promoter was then cloned into pAZ03  
557 plasmid with ReaChR and ArchT separately. As a result two plasmids were created: *gcy-36*  
558 promoter::*ReaChR*::mKate2-unc-54 3'UTR in pCG150 and *gcy-36*  
559 promoter::*ArchT*::mKate2-unc-54 3'UTR in pCG150. To verify the correct sequence of the  
560 cloned constructs, plasmids were sequenced. All constructs generated for this study were made  
561 using the SLiCE method<sup>51</sup>.

562 Transgenic strains with extrachromosomal arrays were generated by microinjection. DNA was  
563 injected into exopher reporter strain worms with muscle exopher RFP and mitochondrial GFP  
564 marker (ACH93). For injection, DNA was prepared as follows: construct 90 ng/ $\mu$ L and co-  
565 injection marker 10 ng/ $\mu$ L. Positive transformants were selected according to the presence of  
566 co-injection markers (myo-2 promoter::mNeonGreen).

567 The constructs created for this project and primers used for amplification are listed in the table  
568 at the beginning of the “Materials and Methods” section.

### 569 **Optogenetics assay**

570 For optogenetic activation or inhibition, 35-mm NGM plates seeded with HT115 *E. coli*  
571 bacteria were covered with 0.2  $\mu$ M all-trans retinal (ATR). Control plates were not covered  
572 with ATR. Ten age-synchronized worms from optogenetic strains (expressing ReaChR or  
573 ArchT in AQR/PQR/URX neurons) were picked per plate at adulthood day 1. After 24-hour  
574 incubation at 20°C and darkness, muscle exophers extruded by worms were counted. Next,  
575 experimental plates were placed on the stereomicroscope and illuminated for 1 hour with green  
576 light (HXP 200C illuminator as a light source, band-pass filter Zeiss BP 572/25 (HE), the green  
577 light intensity measured at 561 nm = 0.07 mW/mm<sup>2</sup>). Immediately after illumination muscle  
578 exophers were counted. Subsequently, exophers scorings were performed in 15 minutes  
579 intervals, and worms were kept in the darkness in between counts. The control group was not  
580 illuminated. To provide similar environmental conditions control plates were placed next to the  
581 experimental plate but shielded from light. Control and treated groups were randomized before  
582 the start of the experiment.

### 583 **FUdR assay**

584 Age-synchronized young adult animals (day 0) were placed on NGM plates containing 25  $\mu$ M  
585 fluorodeoxyuridine (FUdR) or control NGM plates without FUdR. Exophers number were  
586 scored when worms reached adulthood day 2 using a stereomicroscope.

### 587 **Transcriptome analysis**

588 RNA extractions, library preparations, and sequencing were conducted at Azenta US, Inc  
589 (South Plainfield, NJ, USA) as follows:

#### 590 *RNA Extraction*

591 Total RNA was extracted using Qiagen RNeasy Plus mini kit following the manufacturer's  
592 instructions (Qiagen, Hilden, Germany).

#### 593 *Library Preparation with polyA selection and Illumina Sequencing*

594 Extracted RNA samples were quantified using Qubit 2.0 Fluorometer (Life Technologies,  
595 Carlsbad, CA, USA) and RNA integrity was checked using Agilent TapeStation 4200 (Agilent  
596 Technologies, Palo Alto, CA, USA).

597 RNA sequencing libraries were prepared using the NEBNext Ultra II RNA Library Prep Kit  
598 for Illumina following the manufacturer's instructions (NEB, Ipswich, MA, USA). Briefly,  
599 mRNAs were first enriched with Oligo(dT) beads. Enriched mRNAs were fragmented for 15  
600 minutes at 94 °C. First strand and second strand cDNAs were subsequently synthesized. cDNA  
601 fragments were end repaired and adenylated at 3' ends, and universal adapters were ligated to  
602 cDNA fragments, followed by index addition and library enrichment by limited-cycle PCR.  
603 The sequencing libraries were validated on the Agilent TapeStation (Agilent Technologies,  
604 Palo Alto, CA, USA), and quantified by using Qubit 2.0 Fluorometer (Invitrogen, Carlsbad,  
605 CA) as well as by quantitative PCR (KAPA Biosystems, Wilmington, MA, USA).

606 The sequencing libraries were multiplexed and loaded on the flowcell on the Illumina NovaSeq  
607 6000 instrument according to the manufacturer's instructions. The samples were sequenced  
608 using a 2x150 Pair-End (PE) configuration v1.5. Image analysis and base calling were  
609 conducted by the NovaSeq Control Software v1.7 on the NovaSeq instrument. Raw sequence  
610 data (.bcl files) generated from Illumina NovaSeq was converted into fastq files and de-  
611 multiplexed using Illumina bcl2fastq program version 2.20. One mismatch was allowed for  
612 index sequence identification.

### 613 *Sequencing Data Analysis*

614 After investigating the quality of the raw data, sequence reads were trimmed to remove possible  
615 adapter sequences and nucleotides with poor quality using Trimmomatic v.0.36. The trimmed  
616 reads were mapped to the *Caenorhabditis elegans* reference genome available on ENSEMBL  
617 using the STAR aligner v.2.5.2b. The STAR aligner is a splice aligner that detects splice  
618 junctions and incorporates them to help align the entire read sequences. BAM files were  
619 generated as a result of this step. Unique gene hit counts were calculated by using feature  
620 Counts from the Subread package v.1.5.2. Only unique reads that fell within exon regions were  
621 counted.

622 After the extraction of gene hit counts, the gene hit counts table was used for downstream  
623 differential expression analysis. Using DESeq2, a comparison of gene expression between the  
624 groups of samples was performed. The Wald test was used to generate p-values and Log2 fold  
625 changes. Genes with adjusted p-values  $< 0.05$  and absolute log2 fold changes  $> 1$  were called  
626 as differentially expressed genes for each comparison.

### 627 **Data analysis and visualization tools**

628 The exophers were scored at adulthood day 2 using a stereomicroscope unless stated otherwise.

629 Data analysis was performed using Microsoft® Excel® and GraphPad Prism 9 software.

630 Graphical representation of data was depicted using GraphPad Prism 9.

631 **Statistical analysis**

632 No statistical methods were used to predetermine the sample size. Worms were randomly

633 allocated to the experimental groups for all the data sets and experiments were performed

634 blinded for the data sets presented in the following figures: Fig. 2b, e, f, h; Fig. 3b, c, f; Fig. 4f;

635 Extended Data Fig. 3d, e, f. Non-Gaussian distribution of residuals was assumed and therefore

636 nonparametric statistical tests were applied: Mann–Whitney (in comparison between two

637 groups) or Kruskal-Wallis test with Dunn's multiple comparisons test (in comparison between

638 more than two groups). *P*-value < 0.05 is considered significant.

639 **References**

- 640 1. Théry, C. *et al.* Minimal information for studies of extracellular vesicles 2018  
641 (MISEV2018): a position statement of the International Society for Extracellular  
642 Vesicles and update of the MISEV2014 guidelines. *J. Extracell. Vesicles* **7**, 1535750  
643 (2018).
- 644 2. Colombo, M., Raposo, G. & Théry, C. Biogenesis, Secretion, and Intercellular  
645 Interactions of Exosomes and Other Extracellular Vesicles. *Annu. Rev. Cell Dev. Biol.*  
646 **30**, 255–289 (2014).
- 647 3. Fu, S. *et al.* Extracellular vesicles in cardiovascular diseases. *Cell Death Discov.* **6**, 68  
648 (2020).
- 649 4. Hill, A. F. Extracellular Vesicles and Neurodegenerative Diseases. *J. Neurosci.* **39**,  
650 9269 LP – 9273 (2019).
- 651 5. Kalluri, R. The biology and function of exosomes in cancer. *J. Clin. Invest.* **126**, 1208–  
652 1215 (2016).
- 653 6. Wang, J. *et al.* C. elegans Ciliated Sensory Neurons Release Extracellular Vesicles that  
654 Function in Animal Communication. *Curr. Biol.* **24**, 519–525 (2014).
- 655 7. Melentijevic, I. *et al.* C. elegans neurons jettison protein aggregates and mitochondria  
656 under neurotoxic stress. *Nature* **542**, 367–371 (2017).
- 657 8. Turek, M. *et al.* Muscle-derived exophers promote reproductive fitness. *EMBO Rep.*  
658 e52071 (2021) doi:10.15252/embr.202052071.
- 659 9. Liégeois, S., Benedetto, A., Michaux, G., Belliard, G. & Labouesse, M. Genes  
660 required for osmoregulation and apical secretion in Caenorhabditis elegans. *Genetics*  
661 **175**, 709–724 (2007).
- 662 10. Kosinski, M., McDonald, K., Schwartz, J., Yamamoto, I. & Greenstein, D. C. elegans  
663 sperm bud vesicles to deliver a meiotic maturation signal to distant oocytes.

- 664            *Development* **132**, 3357–3369 (2005).
- 665    11.    Cohen, J. D. *et al.* A multi-layered and dynamic apical extracellular matrix shapes the  
666            vulva lumen in *Caenorhabditis elegans*. *Elife* **9**, e57874 (2020).
- 667    12.    Cooper, J. F., Guasp, R. J., Arnold, M. L., Grant, B. D. & Driscoll, M. Stress increases  
668            in exopher-mediated neuronal extrusion require lipid biosynthesis, FGF, and EGF  
669            RAS/MAPK signaling. *Proc. Natl. Acad. Sci.* **118**, e2101410118 (2021).
- 670    13.    Nicolás-Ávila, J. A. *et al.* A Network of Macrophages Supports Mitochondrial  
671            Homeostasis in the Heart. *Cell* **183**, 94-109.e23 (2020).
- 672    14.    Wong, S. S., Yu, J., Schroeder, F. C. & Kim, D. H. Population Density Modulates the  
673            Duration of Reproduction of *C. elegans*. *Curr. Biol.* **30**, 2602-2607.e2 (2020).
- 674    15.    Perez, M. F. *et al.* Neuronal perception of the social environment generates an  
675            inherited memory that controls the development and generation time of *C. elegans*.  
676            *Curr. Biol.* **31**, 4256-4268.e7 (2021).
- 677    16.    Wasson, J. A. *et al.* Neuronal control of maternal provisioning in response to social  
678            cues. *Sci. Adv.* **7**, (2021).
- 679    17.    Brenner, S. The genetics of *Caenorhabditis elegans*. *Genetics* **77**, 71–94 (1974).
- 680    18.    Kamath, R. S., Martinez-Campos, M., Zipperlen, P., Fraser, A. G. & Ahringer, J.  
681            Effectiveness of specific RNA-mediated interference through ingested double-  
682            stranded RNA in *Caenorhabditis elegans*. *Genome Biol.* **2**, RESEARCH0002 (2001).
- 683    19.    Hodgkin, J., Horvitz, H. R. & Brenner, S. Nondisjunction Mutants of the Nematode  
684            CAENORHABDITIS ELEGANS. *Genetics* **91**, 67–94 (1979).
- 685    20.    Ludwig, A. H. & Schroeder, F. C. Ascaroside signaling in *C. elegans*. *WormBook* 1–  
686            22 (2013) doi:10.1895/wormbook.1.155.1.
- 687    21.    Kaplan, F. *et al.* Ascaroside expression in *Caenorhabditis elegans* is strongly  
688            dependent on diet and developmental stage. *PLoS One* **6**, e17804 (2011).



- 689 22. Ferkey, D. M., Sengupta, P. & L'Etoile, N. D. Chemosensory signal transduction in  
690 *Caenorhabditis elegans*. *Genetics* **217**, iyab004 (2021).
- 691 23. Perkins, L. A., Hedgecock, E. M., Thomson, J. N. & Culotti, J. G. Mutant sensory cilia  
692 in the nematode *Caenorhabditis elegans*. *Dev. Biol.* **117**, 456–487 (1986).
- 693 24. Schwartz, H. T. & Horvitz, H. R. The *C. elegans* protein CEH-30 protects male-  
694 specific neurons from apoptosis independently of the Bcl-2 homolog CED-9. *Genes*  
695 *Dev.* **21**, 3181–3194 (2007).
- 696 25. Srinivasan, J. *et al.* A blend of small molecules regulates both mating and development  
697 in *Caenorhabditis elegans*. *Nature* **454**, 1115–1118 (2008).
- 698 26. Macosko, E. Z. *et al.* A hub-and-spoke circuit drives pheromone attraction and social  
699 behaviour in *C. elegans*. *Nature* **458**, 1171–1175 (2009).
- 700 27. Qian, K.-Y. *et al.* Male pheromones modulate synaptic transmission at the *C. elegans*  
701 neuromuscular junction in a sexually dimorphic manner. *Elife* **10**, e67170 (2021).
- 702 28. Aprison, E. Z. & Ruvinsky, I. Counteracting Ascarosides Act through Distinct  
703 Neurons to Determine the Sexual Identity of *C. elegans*  
704 Pheromones. *Curr. Biol.* **27**, 2589-2599.e3 (2017).
- 705 29. Biron, D., Wasserman, S., Thomas, J. H., Samuel, A. D. T. & Sengupta, P. An  
706 olfactory neuron responds stochastically to temperature and modulates *Caenorhabditis*  
707 *elegans* thermotactic behavior. *Proc. Natl. Acad. Sci.* **105**, 11002–11007 (2008).
- 708 30. Kuhara, A. *et al.* Temperature Sensing by an Olfactory Neuron in a Circuit Controlling  
709 Behavior of *C. elegans*. *Science (80-. )*. **320**, 803–807 (2008).
- 710 31. Byerly, L., Cassada, R. C. & Russell, R. L. The life cycle of the nematode  
711 *Caenorhabditis elegans*. I. Wild-type growth and reproduction. *Dev. Biol.* **51**, 23–33  
712 (1976).
- 713 32. Robertson, H. M. & Thomas, J. H. The putative chemoreceptor families of *C. elegans*.

- 714 *WormBook* 1–12 (2006) doi:10.1895/wormbook.1.66.1.
- 715 33. Gruner, M. *et al.* Feeding state, insulin and NPR-1 modulate chemoreceptor gene  
716 expression via integration of sensory and circuit inputs. *PLoS Genet.* **10**, e1004707  
717 (2014).
- 718 34. Ryan, D. A. *et al.* Sex, Age, and Hunger Regulate Behavioral Prioritization through  
719 Dynamic Modulation of Chemoreceptor Expression. *Curr. Biol.* **24**, 2509–2517  
720 (2014).
- 721 35. Wexler, L. R., Miller, R. M. & Portman, D. S. C. *elegans* Males Integrate Food Signals  
722 and Biological Sex to Modulate State-Dependent Chemosensation and Behavioral  
723 Prioritization. *Curr. Biol.* **30**, 2695–2706.e4 (2020).
- 724 36. McLachlan, I. G. *et al.* Diverse states and stimuli tune olfactory receptor expression  
725 levels to modulate food-seeking behavior. *Elife* **11**, (2022).
- 726 37. Taylor, S. R. *et al.* Molecular topography of an entire nervous system. *Cell* **184**, 4329-  
727 4347.e23 (2021).
- 728 38. White, J. G., Southgate, E., Thomson, J. N. & Brenner, S. The structure of the nervous  
729 system of the nematode *Caenorhabditis elegans*. *Philos. Trans. R. Soc. London. Ser. B,*  
730 *Biol. Sci.* **314**, 1–340 (1986).
- 731 39. Coates, J. C. & de Bono, M. Antagonistic pathways in neurons exposed to body fluid  
732 regulate social feeding in *Caenorhabditis elegans*. *Nature* **419**, 925–929 (2002).
- 733 40. Okazaki, A. & Takagi, S. An optogenetic application of proton pump ArchT to *C.*  
734 *elegans* cells. *Neurosci. Res.* **75**, 29–34 (2013).
- 735 41. Lin, J. Y., Knutsen, P. M., Muller, A., Kleinfeld, D. & Tsien, R. Y. ReaChR: a red-  
736 shifted variant of channelrhodopsin enables deep transcranial optogenetic excitation.  
737 *Nat. Neurosci.* **16**, 1499–1508 (2013).
- 738 42. Aprison, E. Z., Dzitoyeva, S., Angeles-Albores, D. & Ruvinsky, I. A male pheromone

- 739 that improves the quality of the oogenic germline. *Proc. Natl. Acad. Sci. U. S. A.* **119**,  
740 e2015576119 (2022).
- 741 43. Aprison, E. Z. & Ruvinsky, I. Sexually Antagonistic Male Signals Manipulate  
742 Germline and Soma of *C. elegans* Hermaphrodites. *Curr. Biol.* **26**, 2827–2833 (2016).
- 743 44. Corrigan, L. *et al.* BMP-regulated exosomes from *Drosophila* male reproductive  
744 glands reprogram female behavior. *J. Cell Biol.* **206**, 671–688 (2014).
- 745 45. Sanchez-Lopez, J. A. *et al.* Male-female communication enhances release of  
746 extracellular vesicles leading to high fertility in *Drosophila*. *Commun. Biol.* **5**, 815  
747 (2022).
- 748 46. Berumen Sánchez, G., Bunn, K. E., Pua, H. H. & Rafat, M. Extracellular vesicles:  
749 mediators of intercellular communication in tissue injury and disease. *Cell Commun.*  
750 *Signal.* **19**, 104 (2021).
- 751 47. Roh, D. *et al.* The association between olfactory dysfunction and cardiovascular  
752 disease and its risk factors in middle-aged and older adults. *Sci. Rep.* **11**, 1248 (2021).
- 753 48. Liu, B. *et al.* Relationship Between Poor Olfaction and Mortality Among Community-  
754 Dwelling Older Adults: A Cohort Study. *Ann. Intern. Med.* **170**, 673–681 (2019).
- 755 49. Kamath, R. S. & Ahringer, J. Genome-wide RNAi screening in *Caenorhabditis*  
756 *elegans*. *Methods* **30**, 313–321 (2003).
- 757 50. Dokshin, G. A., Ghanta, K. S., Piscopo, K. M. & Mello, C. C. Robust Genome Editing  
758 with Short Single-Stranded and Long, Partially Single-Stranded DNA Donors in  
759 *Caenorhabditis elegans*. *Genetics* **210**, 781–787 (2018).
- 760 51. Zhang, Y., Werling, U. & Edelman, W. SLiCE: a novel bacterial cell extract-based  
761 DNA cloning method. *Nucleic Acids Res.* **40**, e55–e55 (2012).
- 762

763 **Acknowledgements**

764 Some strains were provided by the CGC, which is funded by NIH Office of Research  
765 Infrastructure Programs (P40 OD010440). We thank Henrik Bringmann and Lukas Kapitein  
766 for plasmids; Frank Schroeder for expert advice; Peter Askjaer, Henrik Bringmann, and  
767 Antonio Miranda Vizuite for discussions and comments on the manuscript; Zofia Olszewska,  
768 Marta Niklewicz, and Monika Woźniak for assistance with worms maintenance. Work in the  
769 M. T. Laboratory was mainly funded by a National Science Centre SONATA grant  
770 (2019/35/D/NZ3/04091) and additionally supported by a National Science Centre SONATA  
771 BIS grant (2021/42/E/NZ3/00358). Work in the W. P. Laboratory was funded by the  
772 Foundation for Polish Science co-financed by the European Union under the European  
773 Regional Development Fund (grant POIR.04.04.00-00-5EAB/18-00 to K.B., and W.P.), and  
774 additionally supported by the European Molecular Biology Organization (EMBO Installation  
775 Grant No. 3916 to K.B., and W.P.), and the Norwegian Financial Mechanism 2014-2021  
776 operated by the Polish National Science Centre, Poland (project contract number  
777 2019/34/H/NZ3/00691 to W.P.).
